# Supplementary material for: Diacylthioureas – an overlooked class of ligands; the coordination chemistry of diacylated thiourea with platinum(ii), palladium(ii) and gold(iii)
Source: Royal Society of Chemistry journal article supplement (doi:10.1039/d4dt03390f), 2025-01-01
Supplement: d4dt03390f1.pdf [file d4dt03390f1.pdf]

Supplementary data for

**Diacylthioureas – an overlooked class of ligands; the coordination chemistry of diacylated thiourea with platinum(II) palladium(II) and gold(III).**

Matthew C. Risi<sup>a\*</sup>, Simeon Atiga<sup>a</sup>, Timothy D. Christopher<sup>b</sup>, William Henderson<sup>a</sup> and Graham C. Saunders.<sup>a</sup>

[a] Chemistry and Applied Physics, Te Aka Mātuatua - School of Science, University of Waikato, Private Bag 3105, Hamilton 3240, New Zealand. *E-mail: mrisi@waikato.ac.nz*

[b] School of Chemical Sciences, University of Auckland, Private Bag 92019, Auckland 1142, New Zealand

\* Author to whom correspondence should be addressed

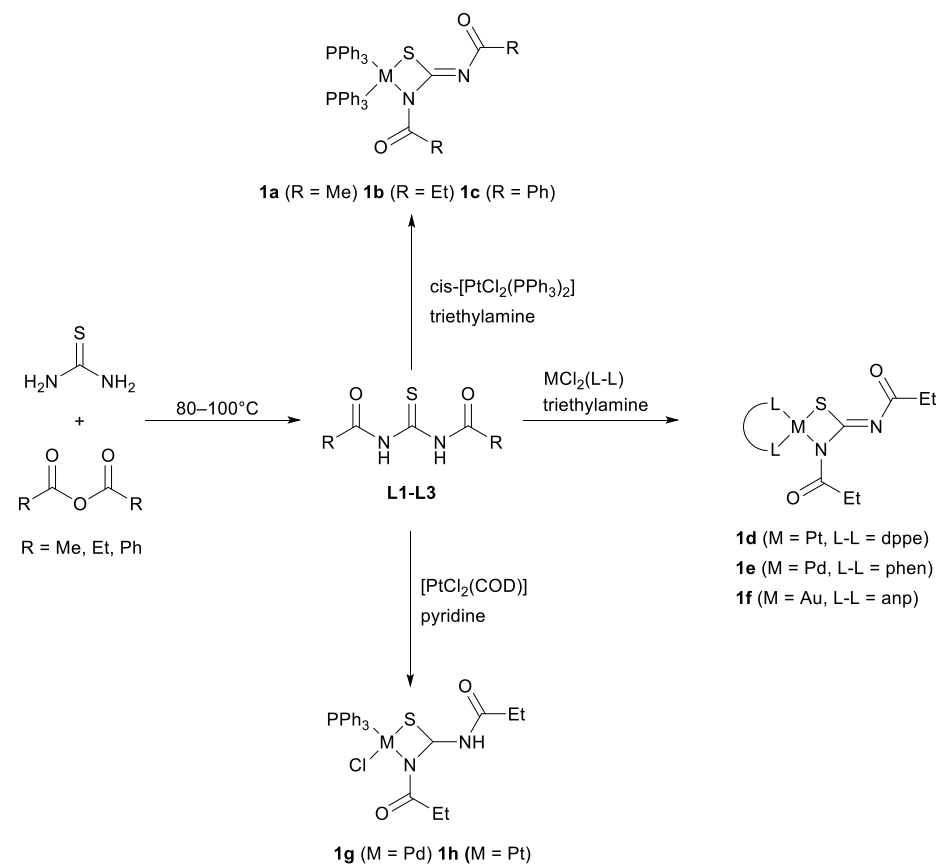

Scheme S1: Full reaction scheme for the complexes and ligands prepared in this study.

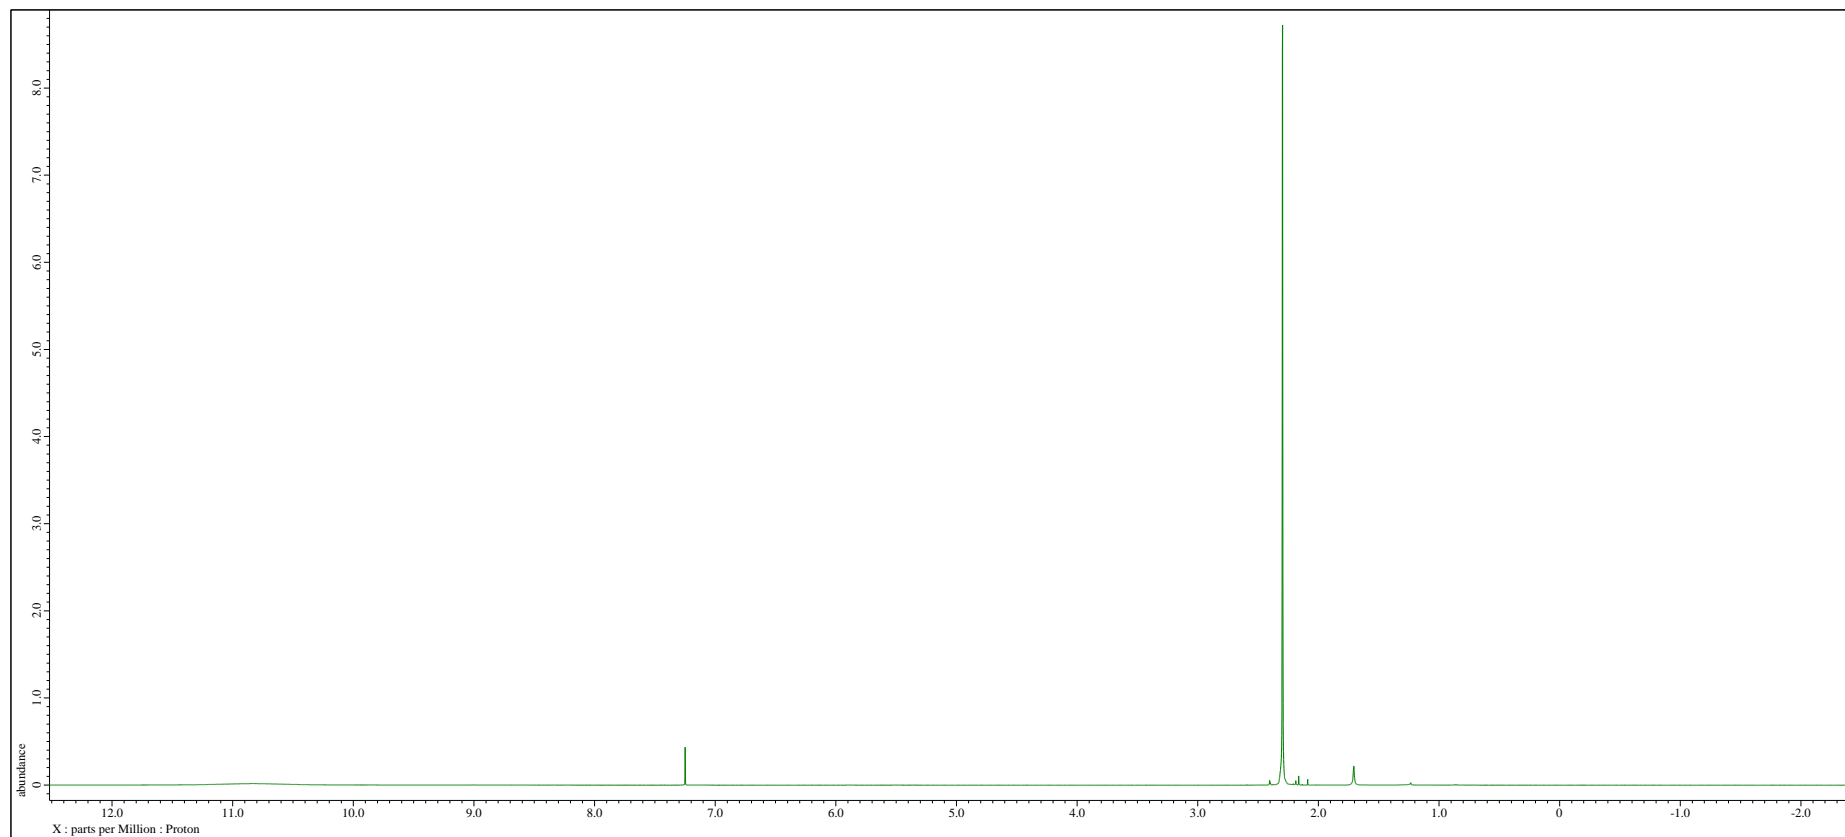

Figure S1:  $^1\text{H}$  NMR spectrum of ligand **L1**

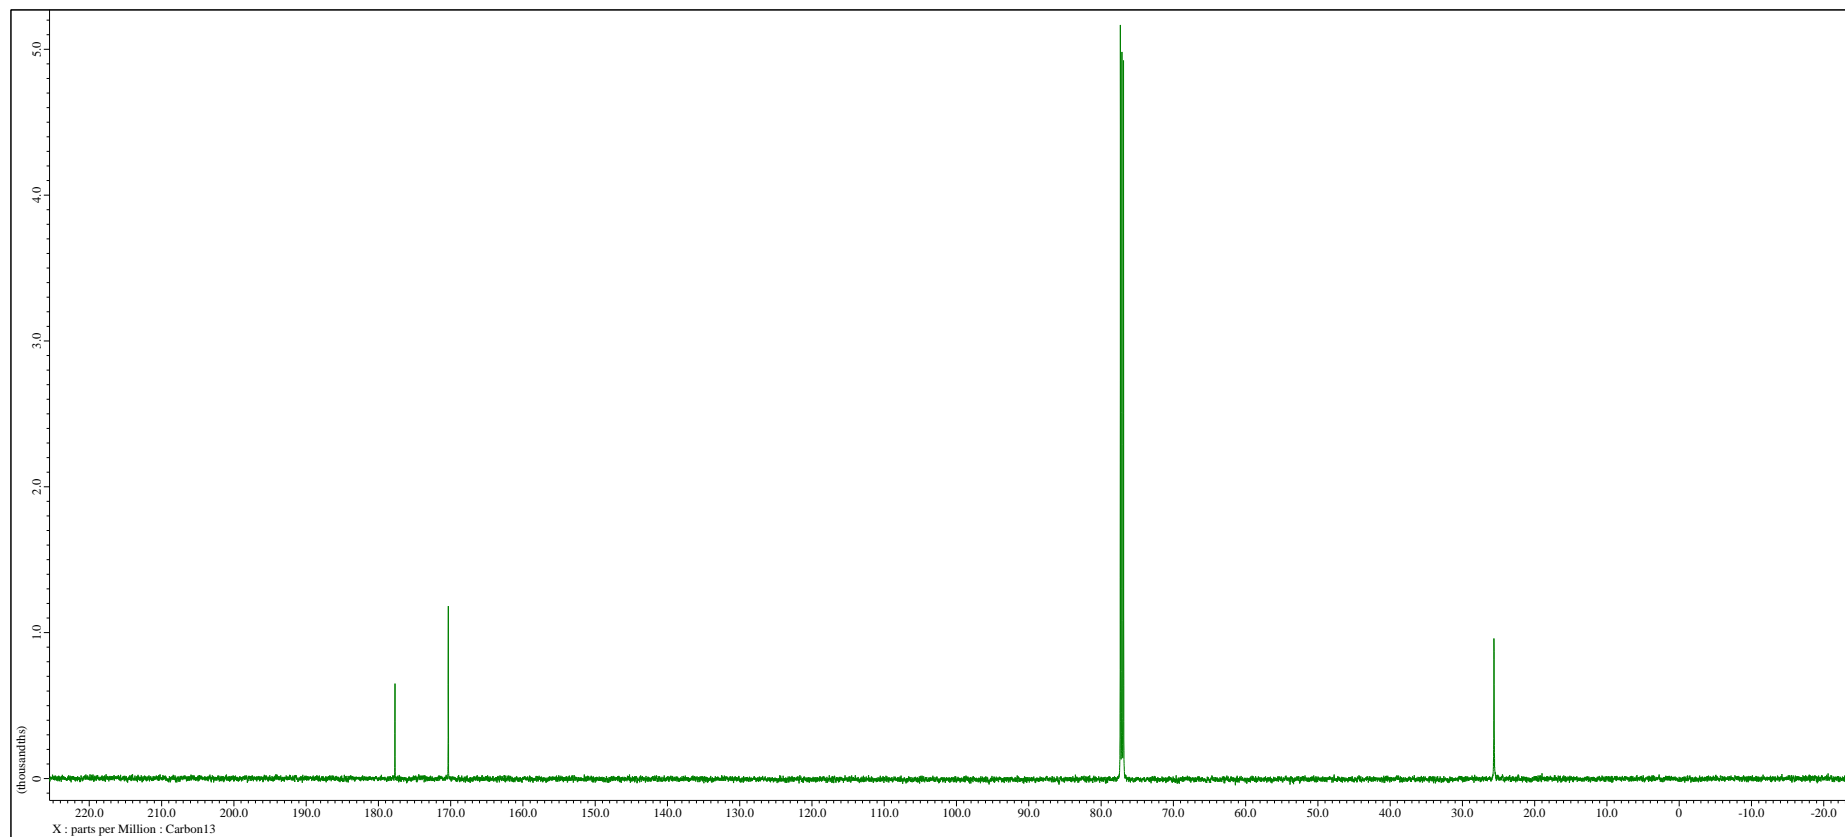

Figure S2:  $^{13}\text{C}$  NMR spectrum of ligand L1

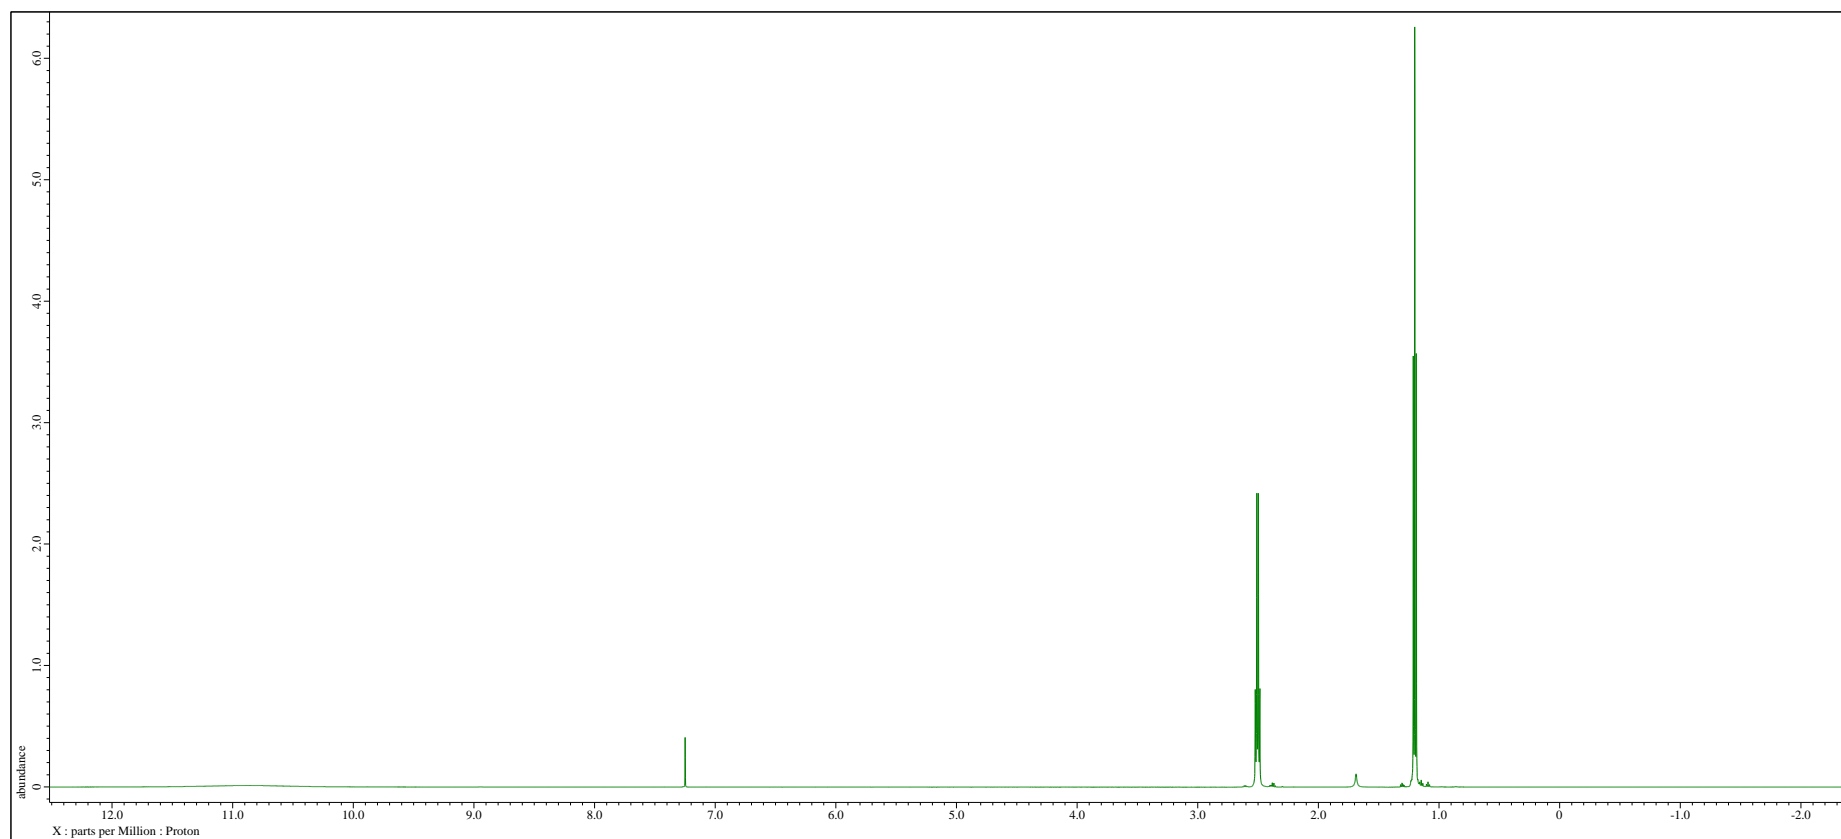

Figure S3:  $^1\text{H}$  NMR spectrum of ligand **L2**

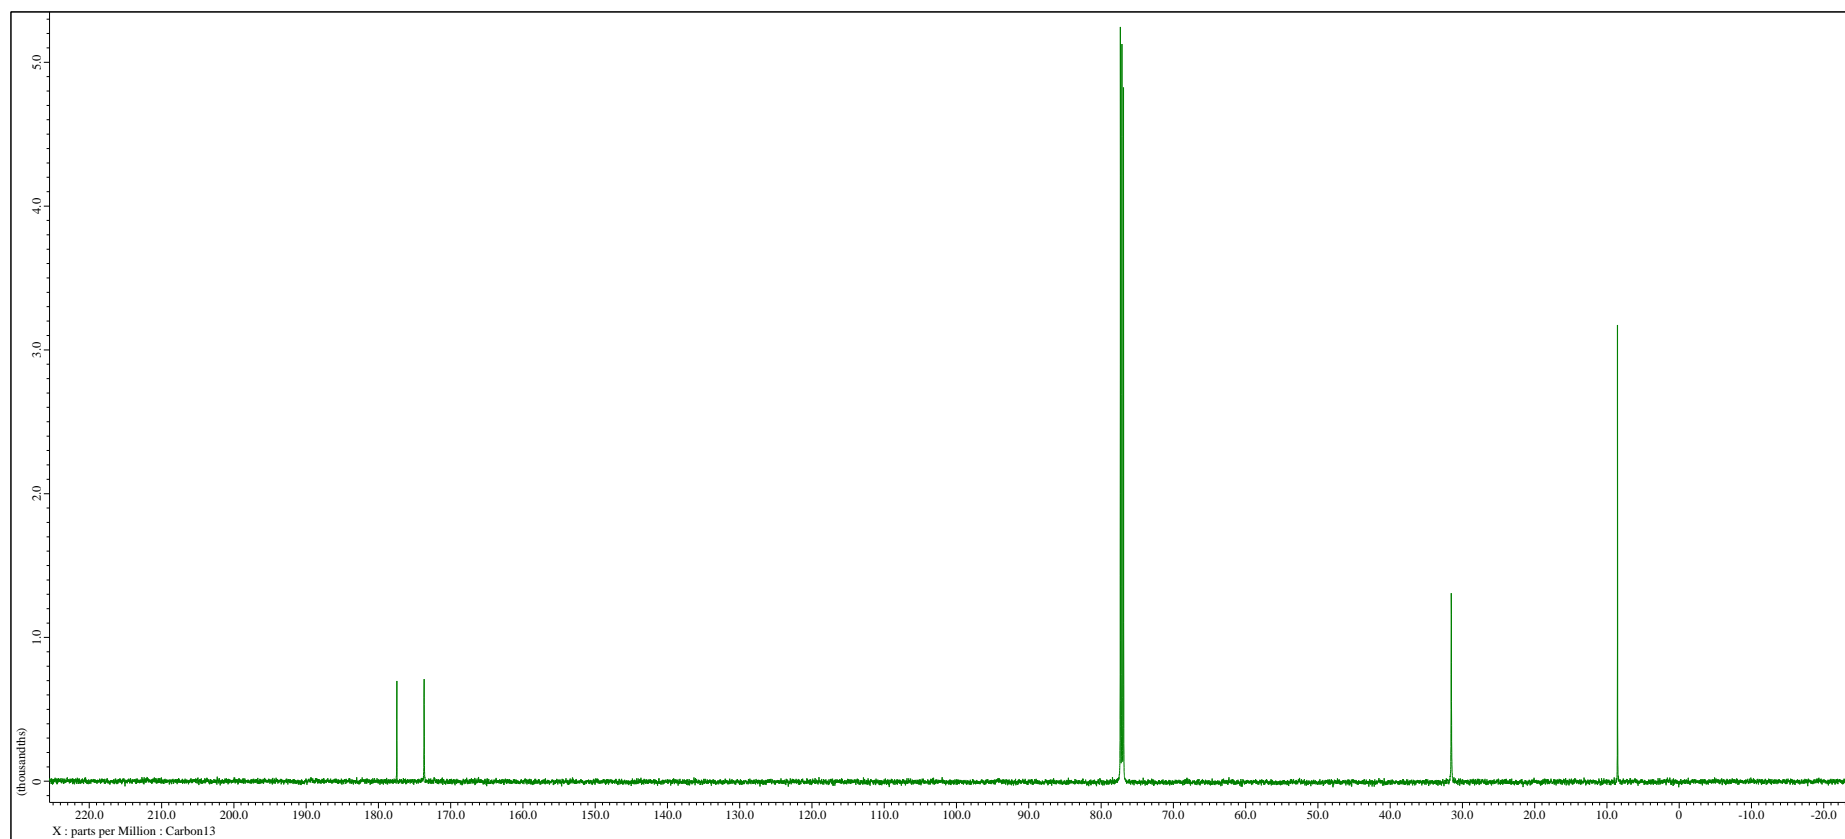

Figure S4:  $^{13}\text{C}$  NMR spectrum of ligand L2

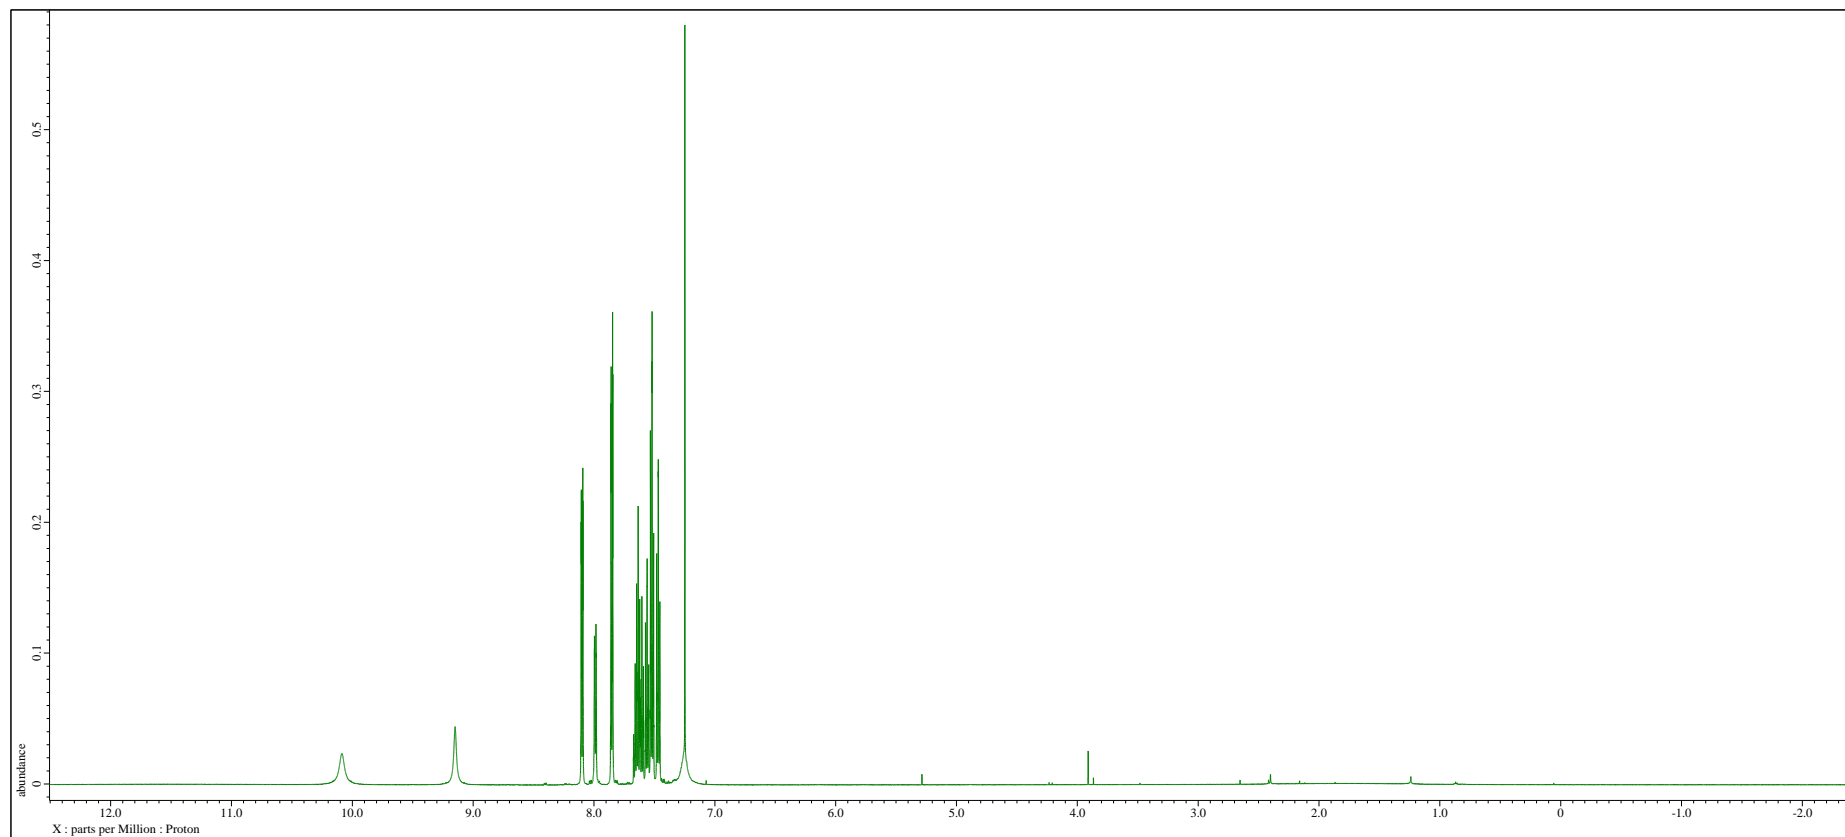

Figure S5:  $^1\text{H}$  NMR spectrum of ligand **L3**

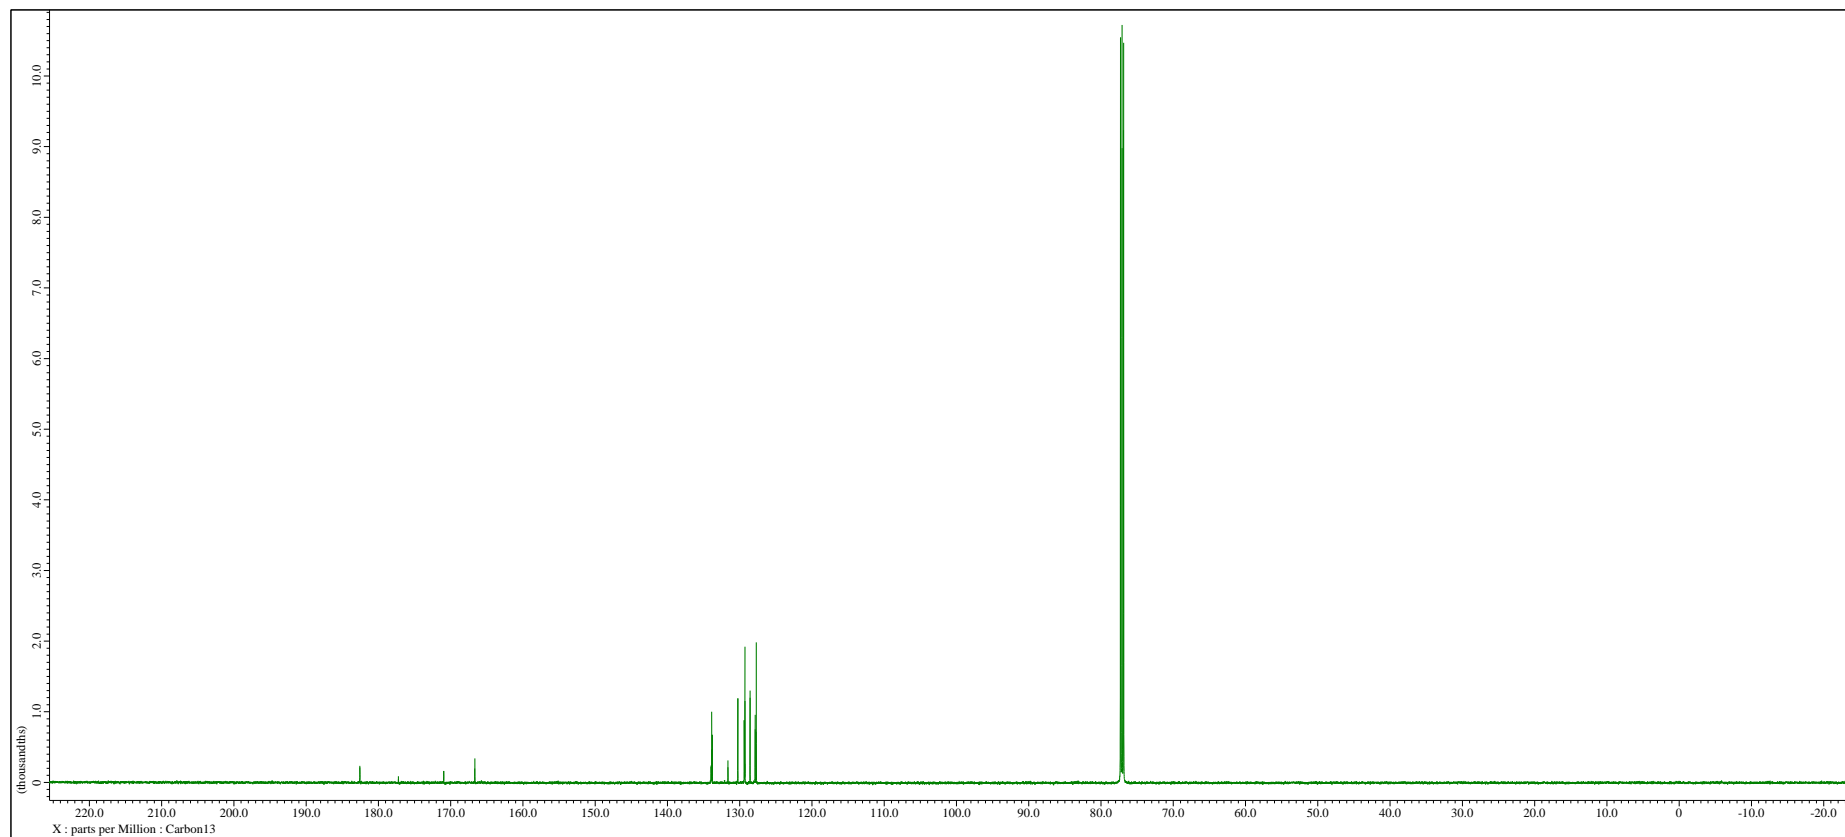

Figure S6:  $^{13}\text{C}$  NMR spectrum of ligand **L3**



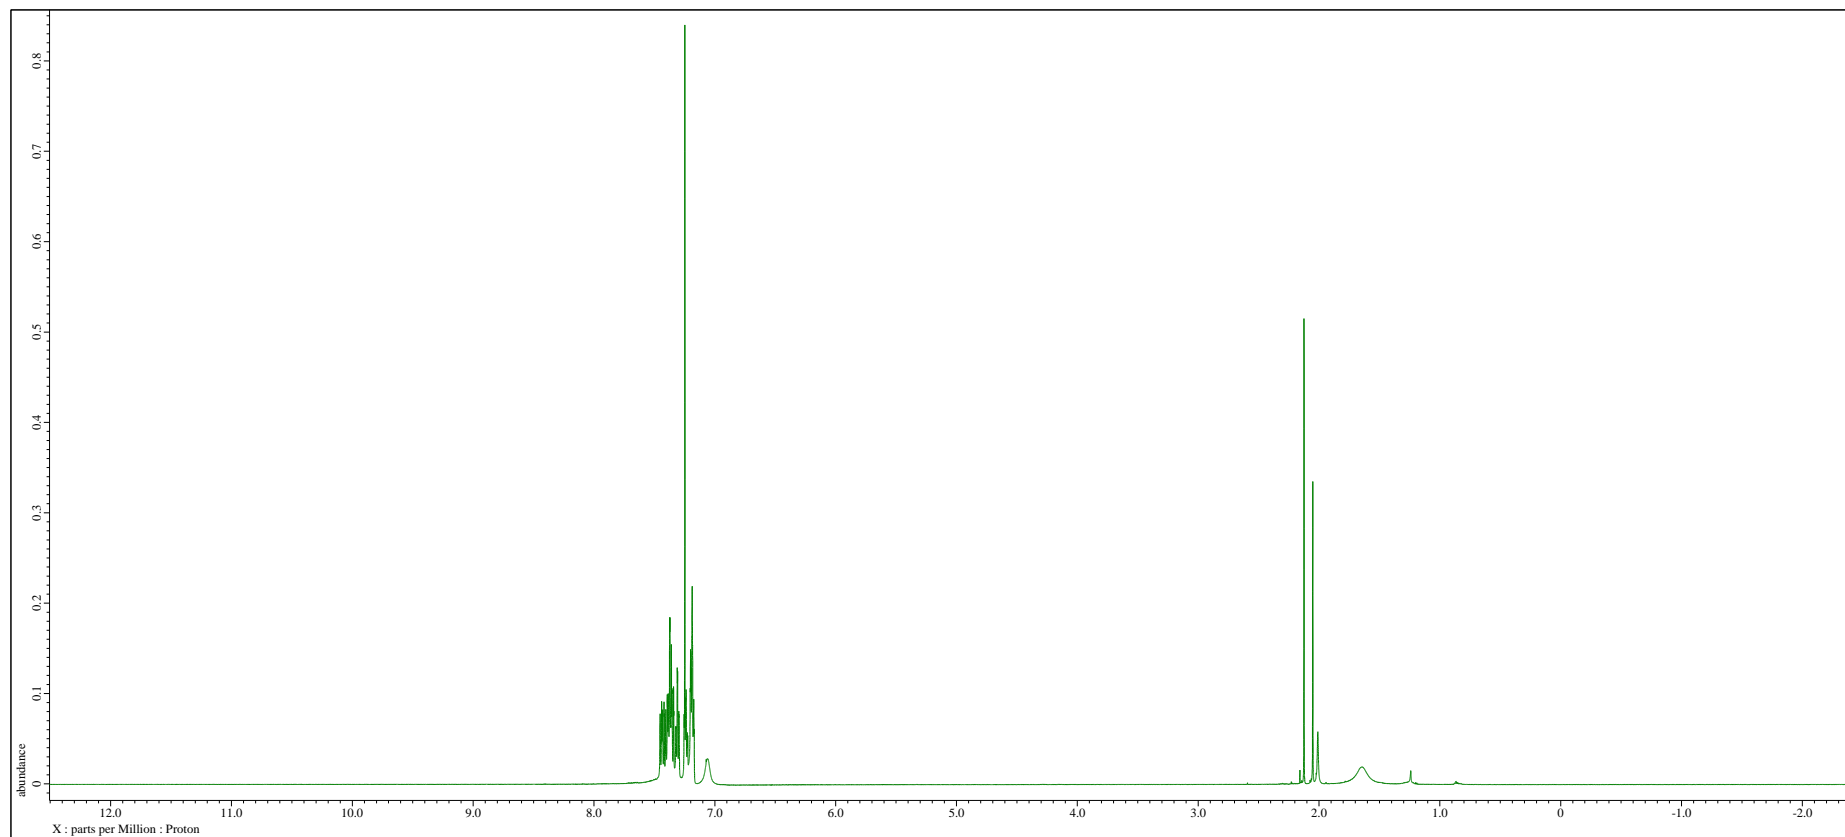

Figure S7:  $^1\text{H}$  NMR spectrum of complex **1a**

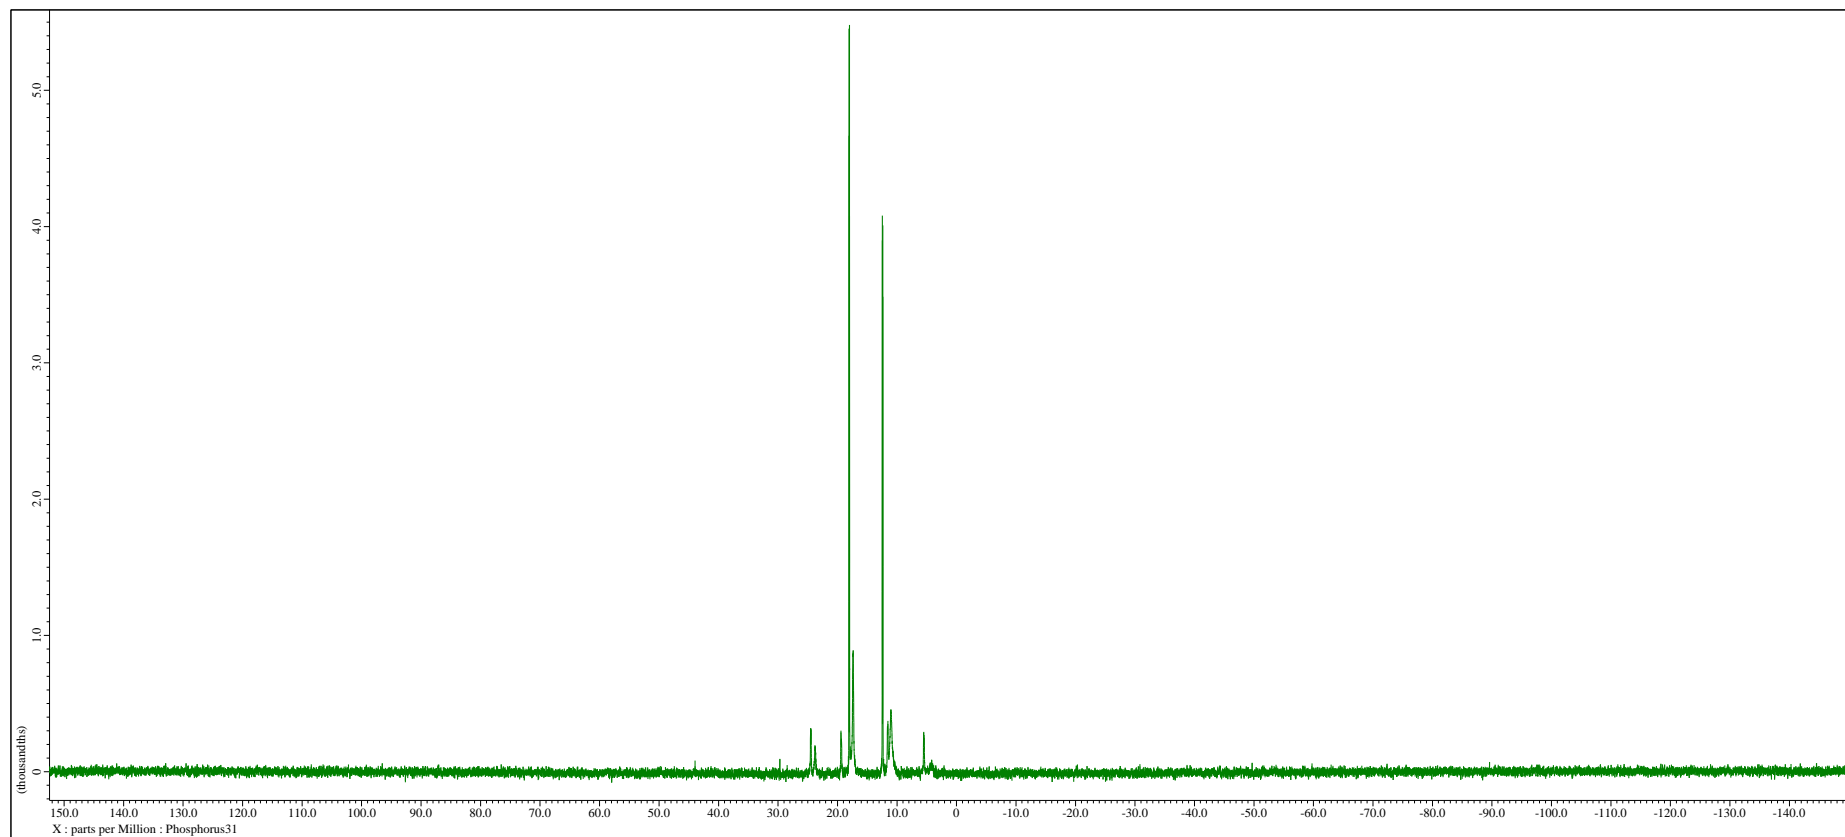

Figure S8:  $^{31}\text{P}\{^1\text{H}\}$  NMR spectrum of complex **1a**

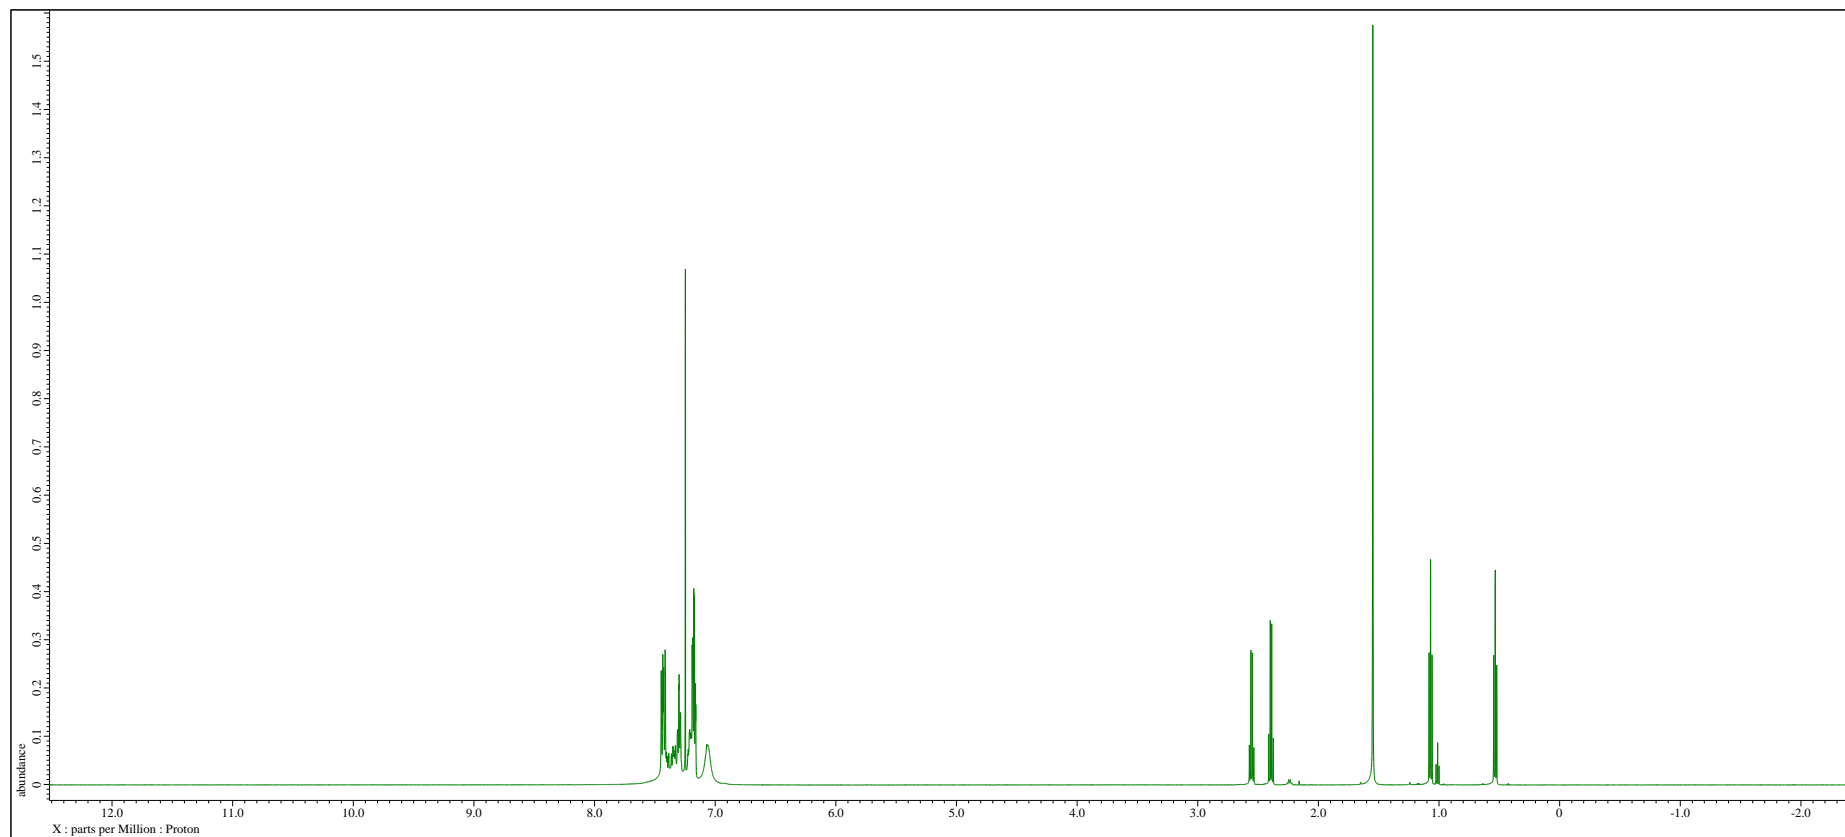

Figure S9:  $^1\text{H}$  NMR spectrum of complex **1b**

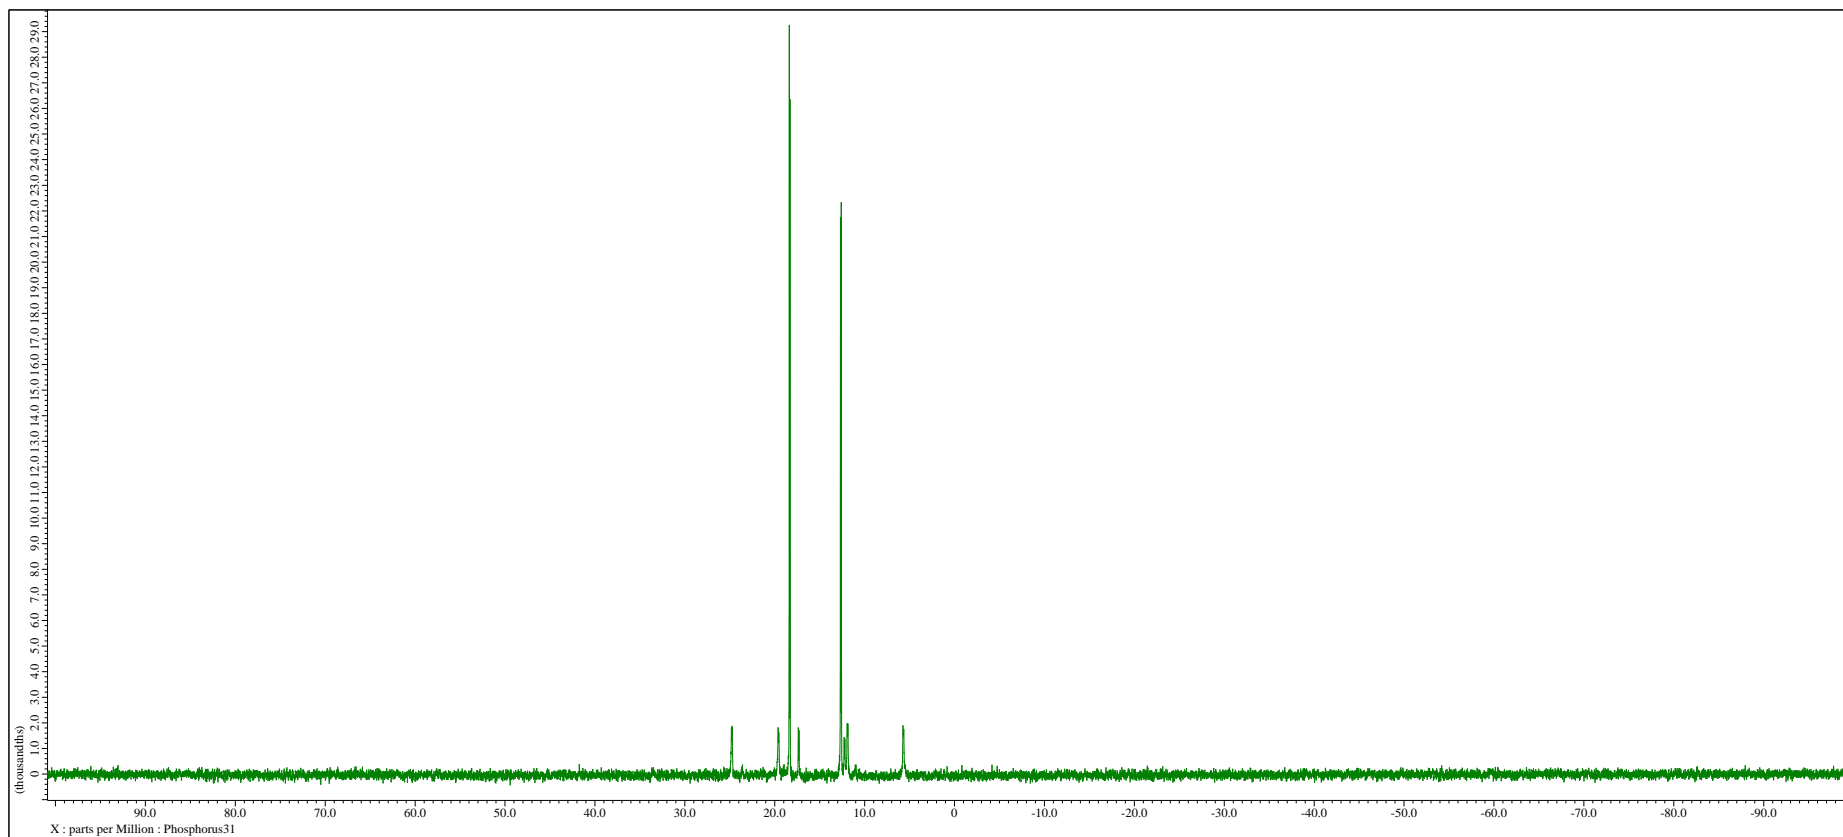

Figure S10:  $^{31}\text{P}\{^1\text{H}\}$  NMR spectrum of complex **1b**

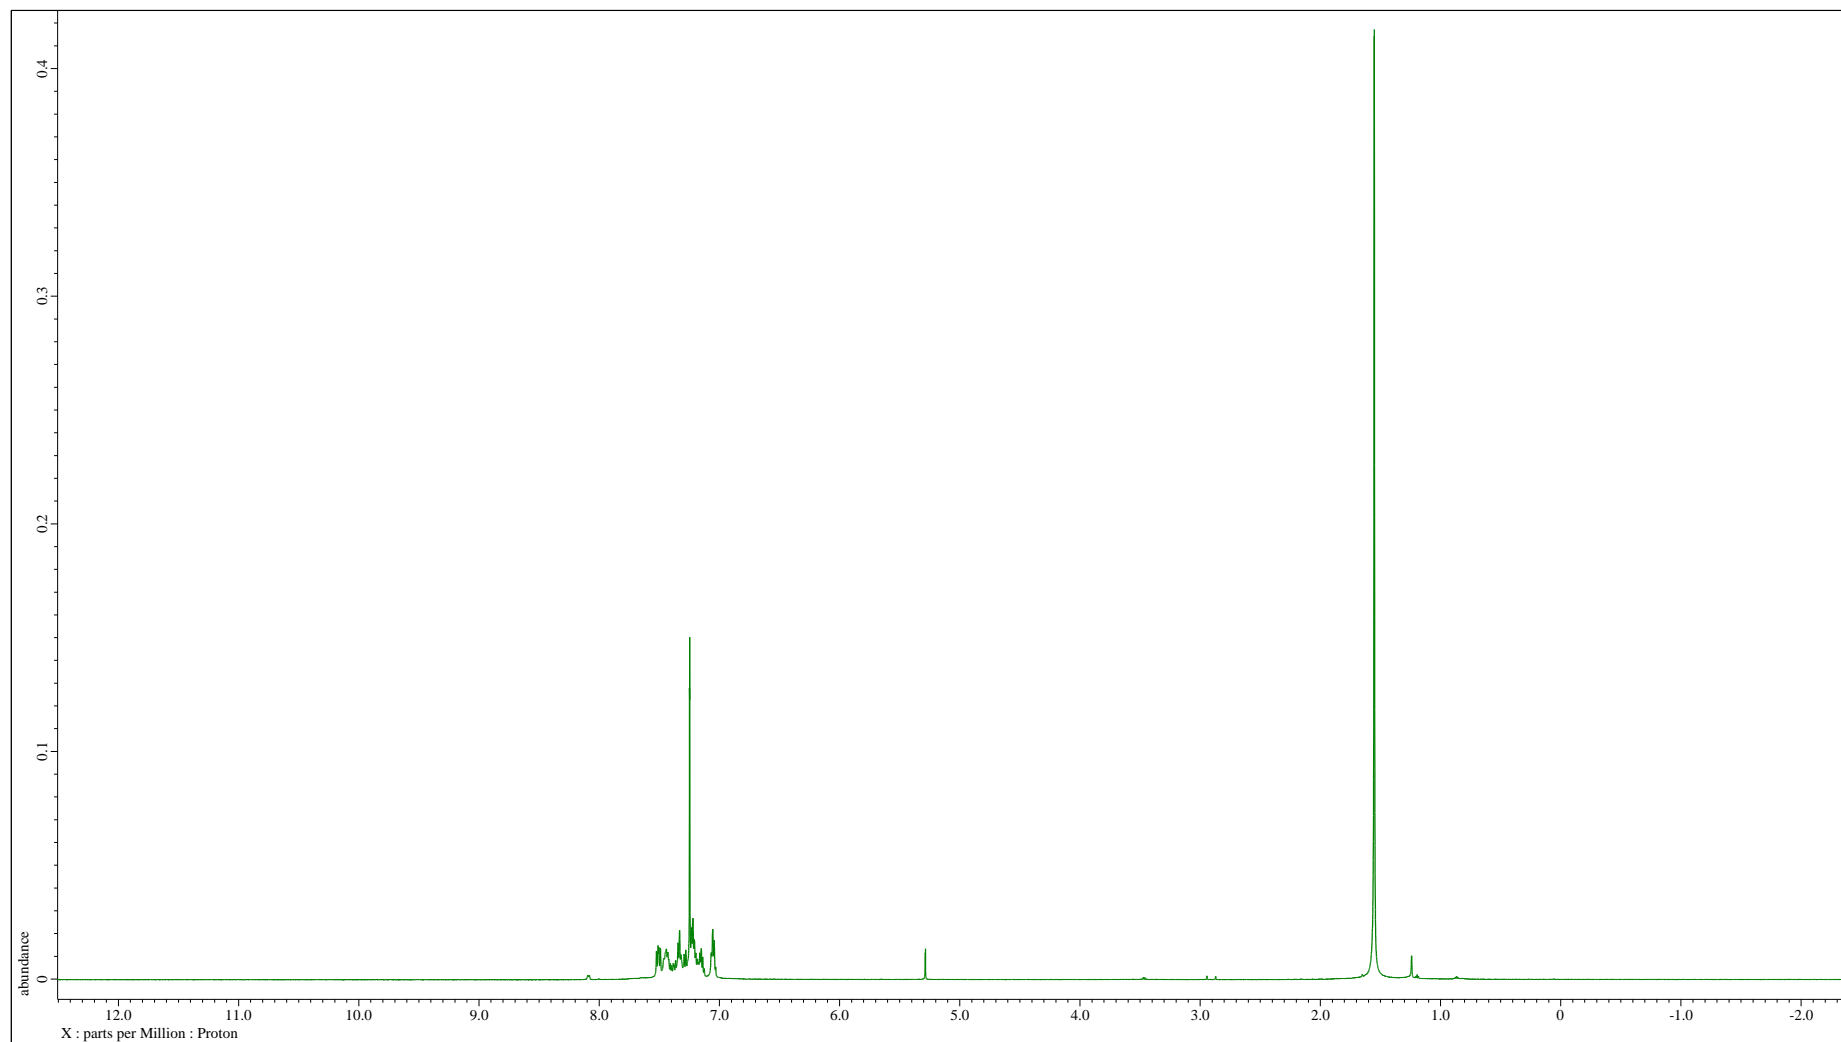

Figure S11:  $^1\text{H}$  NMR spectrum of complex **1c**

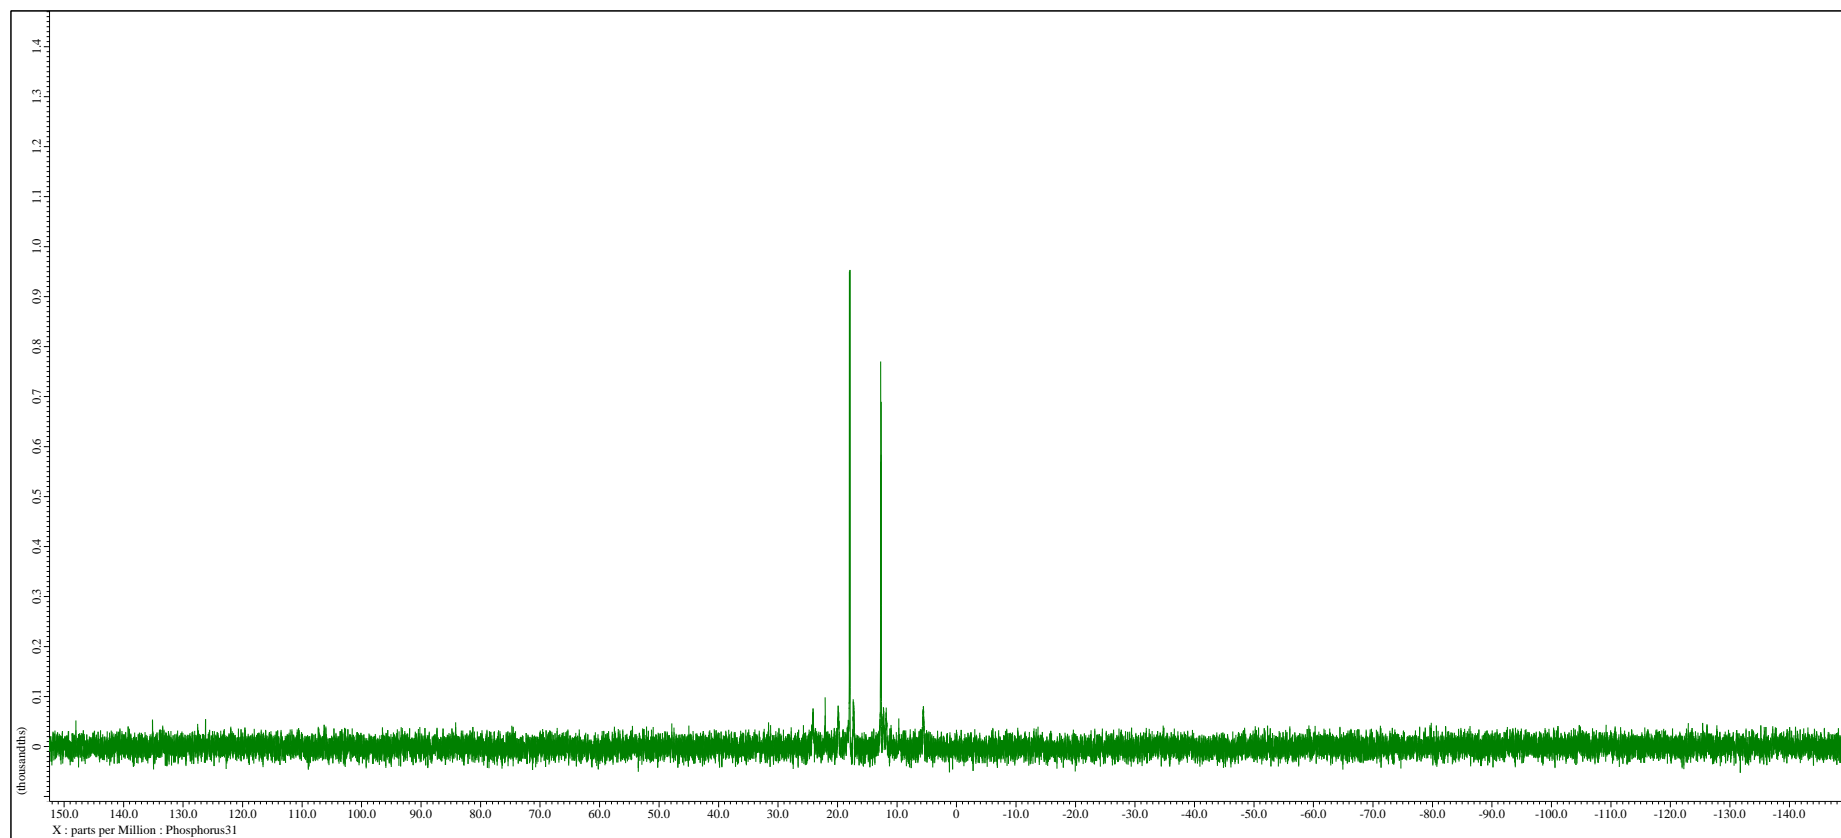

Figure S12:  $^{31}\text{P}\{^1\text{H}\}$  NMR spectrum of complex **1c**

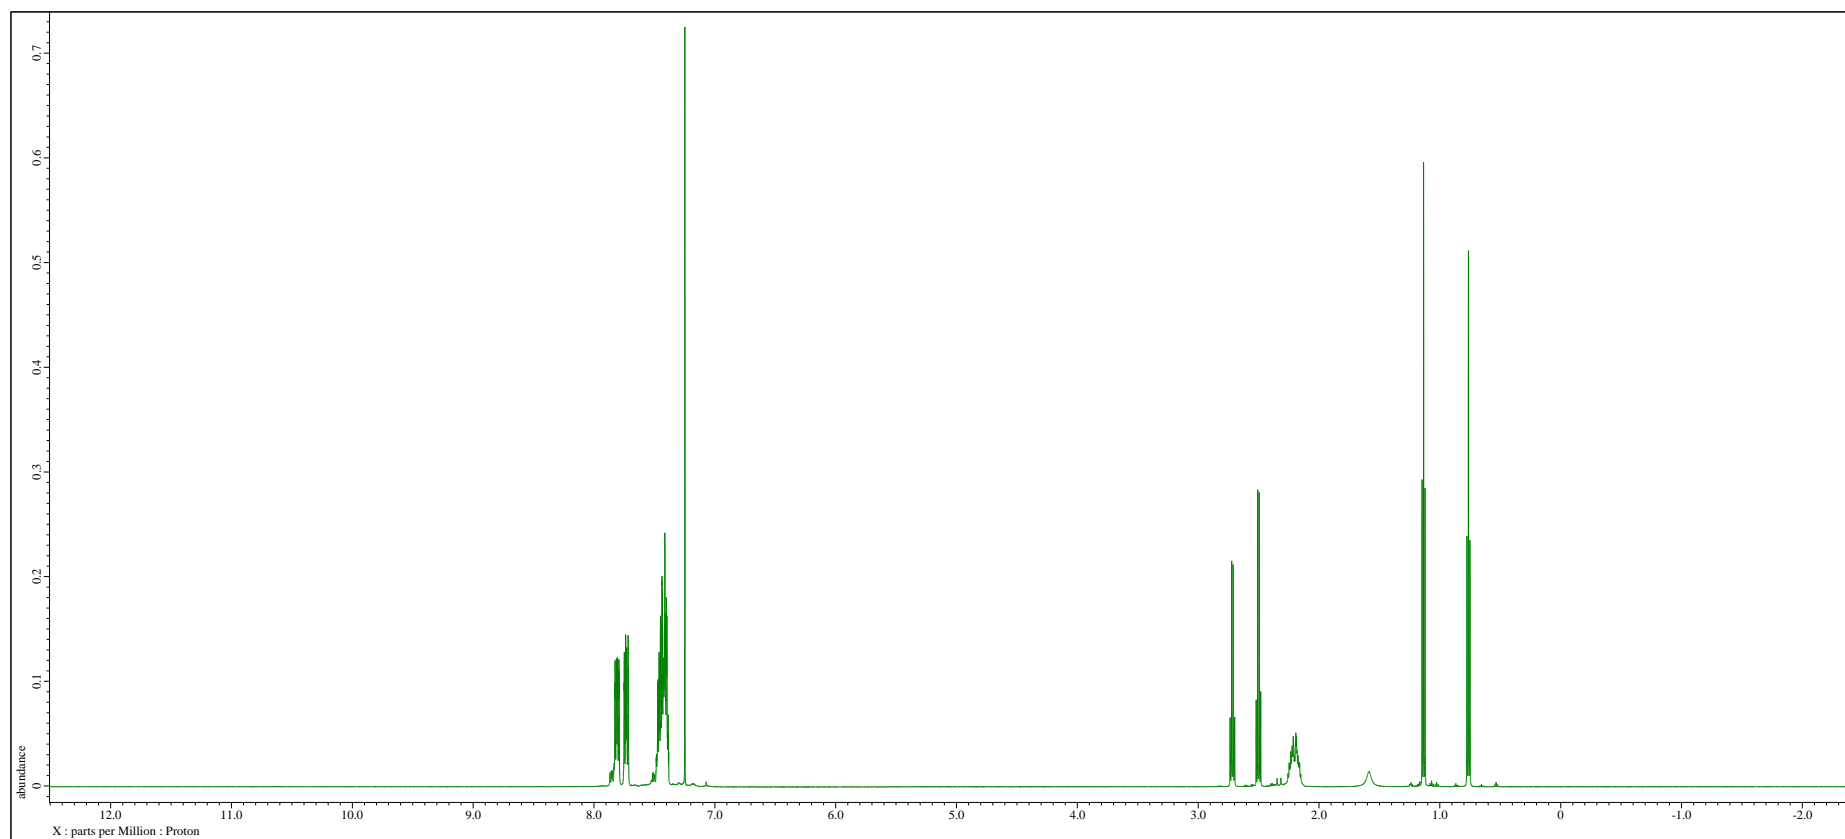

Figure S13:  $^1\text{H}$  NMR spectrum of complex **1d**

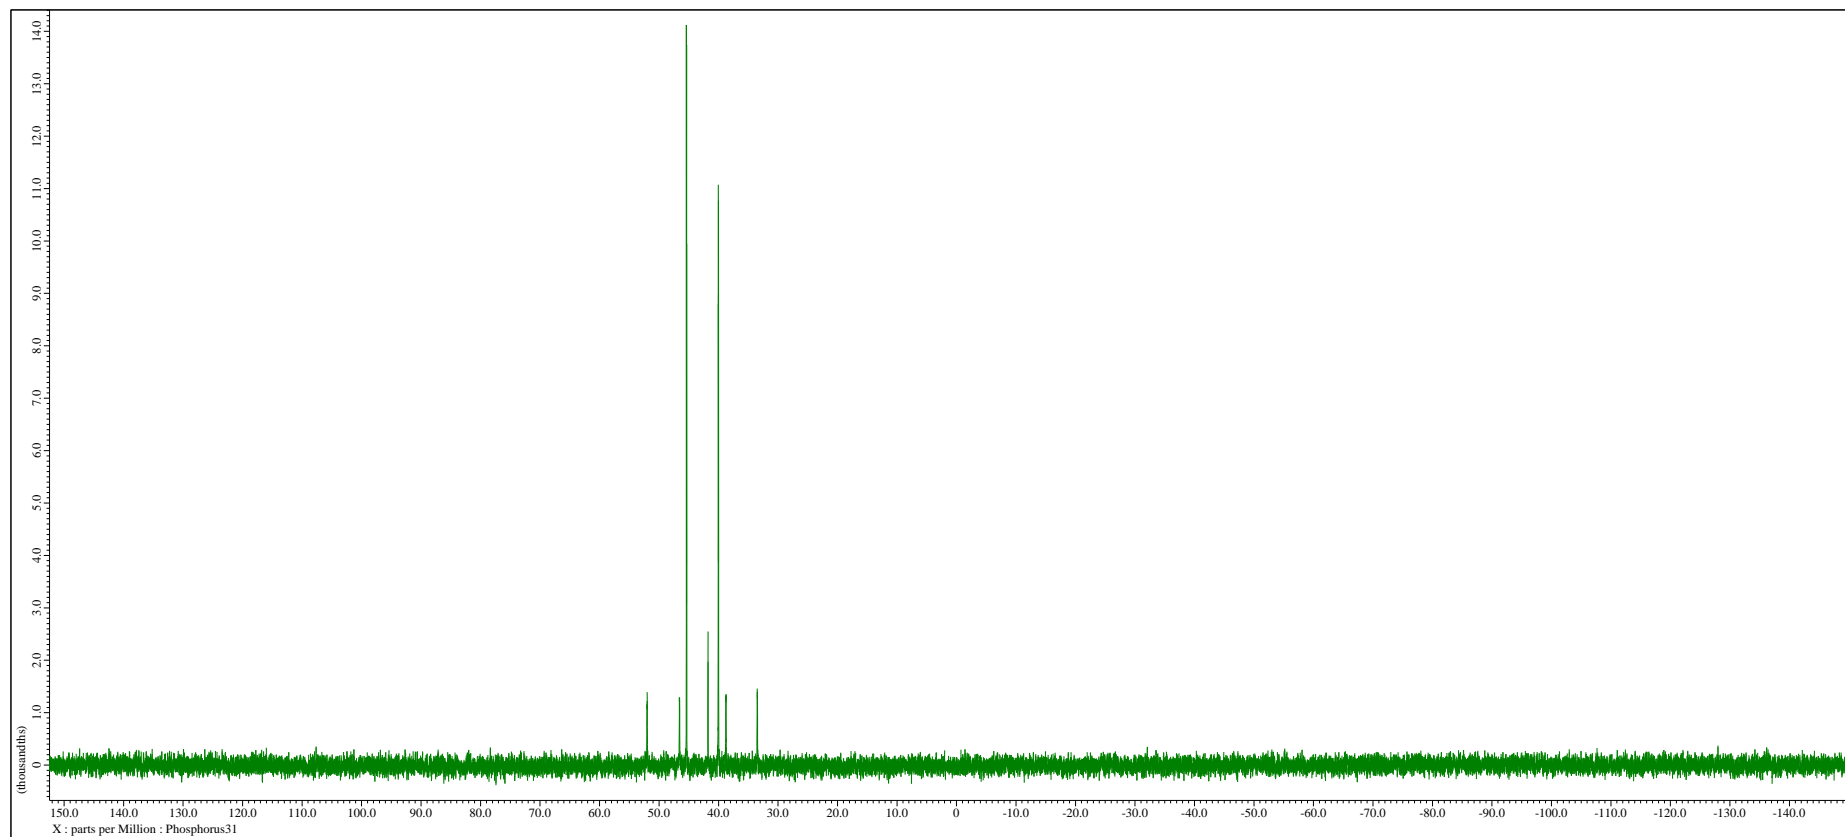

Figure S14:  $^{31}\text{P}\{^1\text{H}\}$  NMR spectrum of complex **1d**



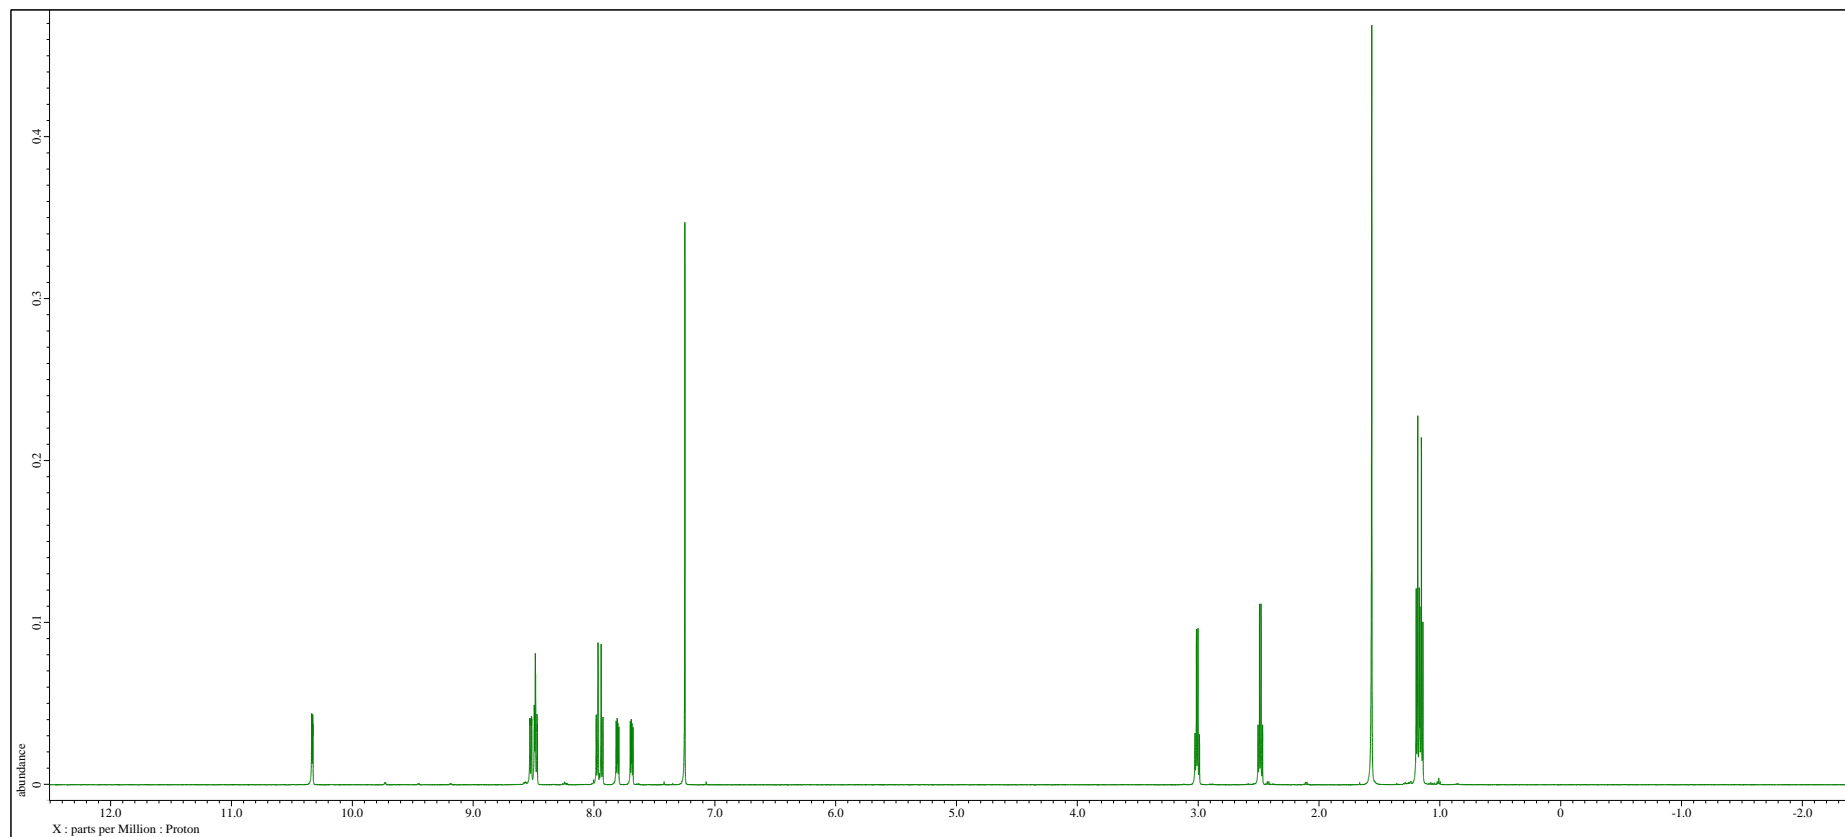

Figure S15:  $^1\text{H}$  NMR spectrum of complex **1e**

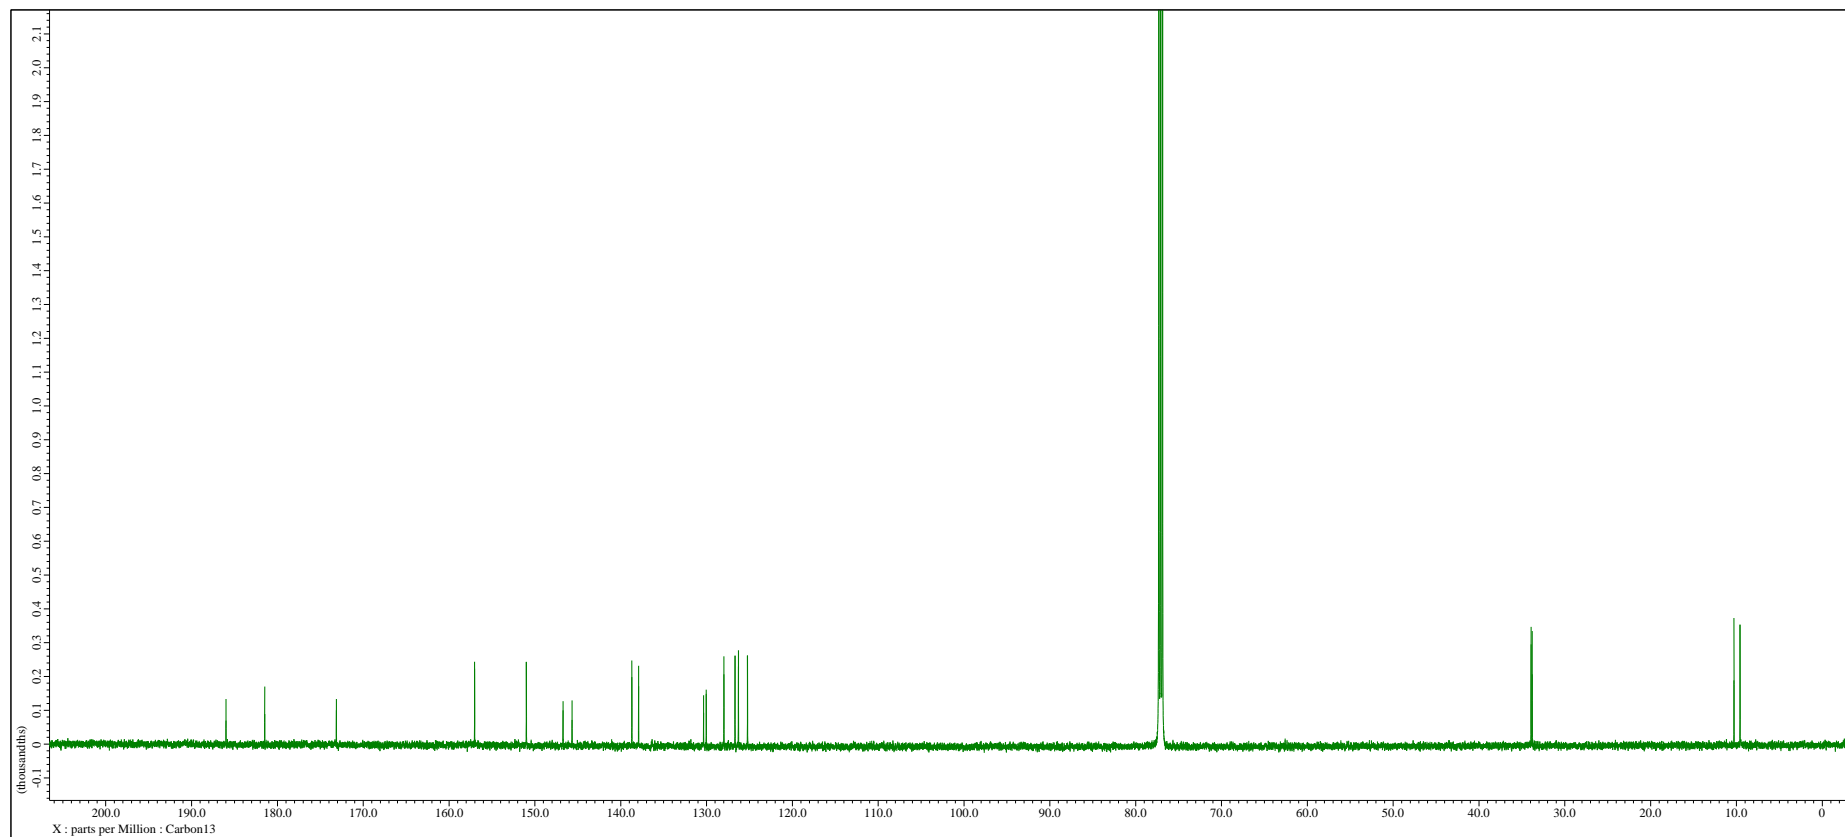

Figure S16:  $^{13}\text{C}$  NMR spectrum of complex **1e**

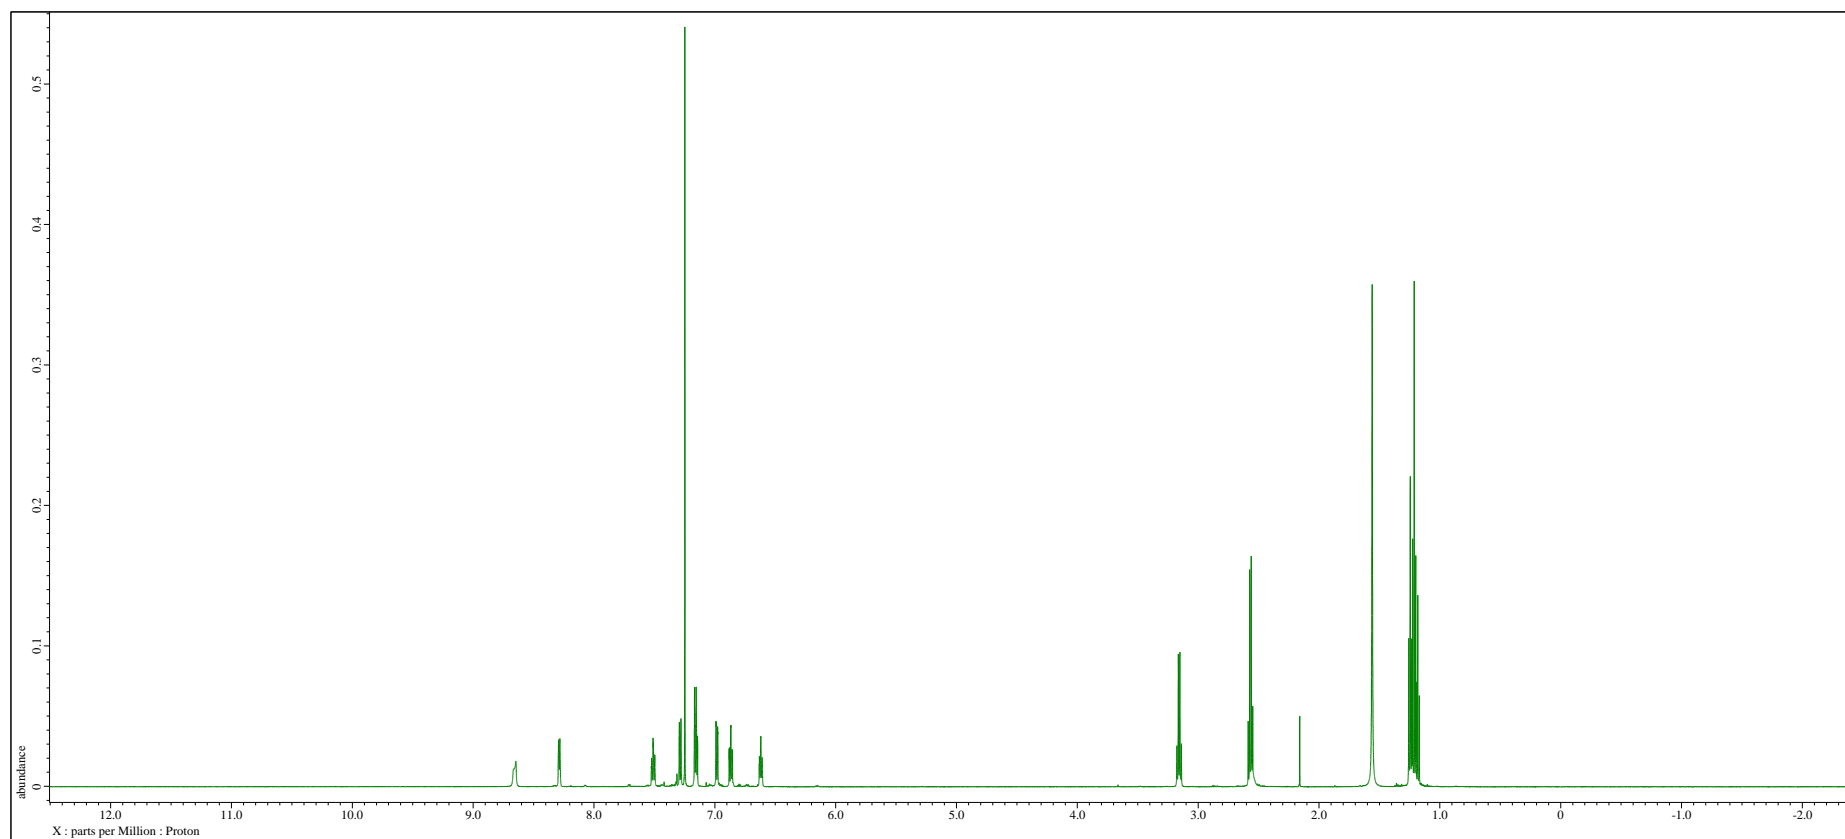

Figure S17:  $^1\text{H}$  NMR spectrum of complex **1f**

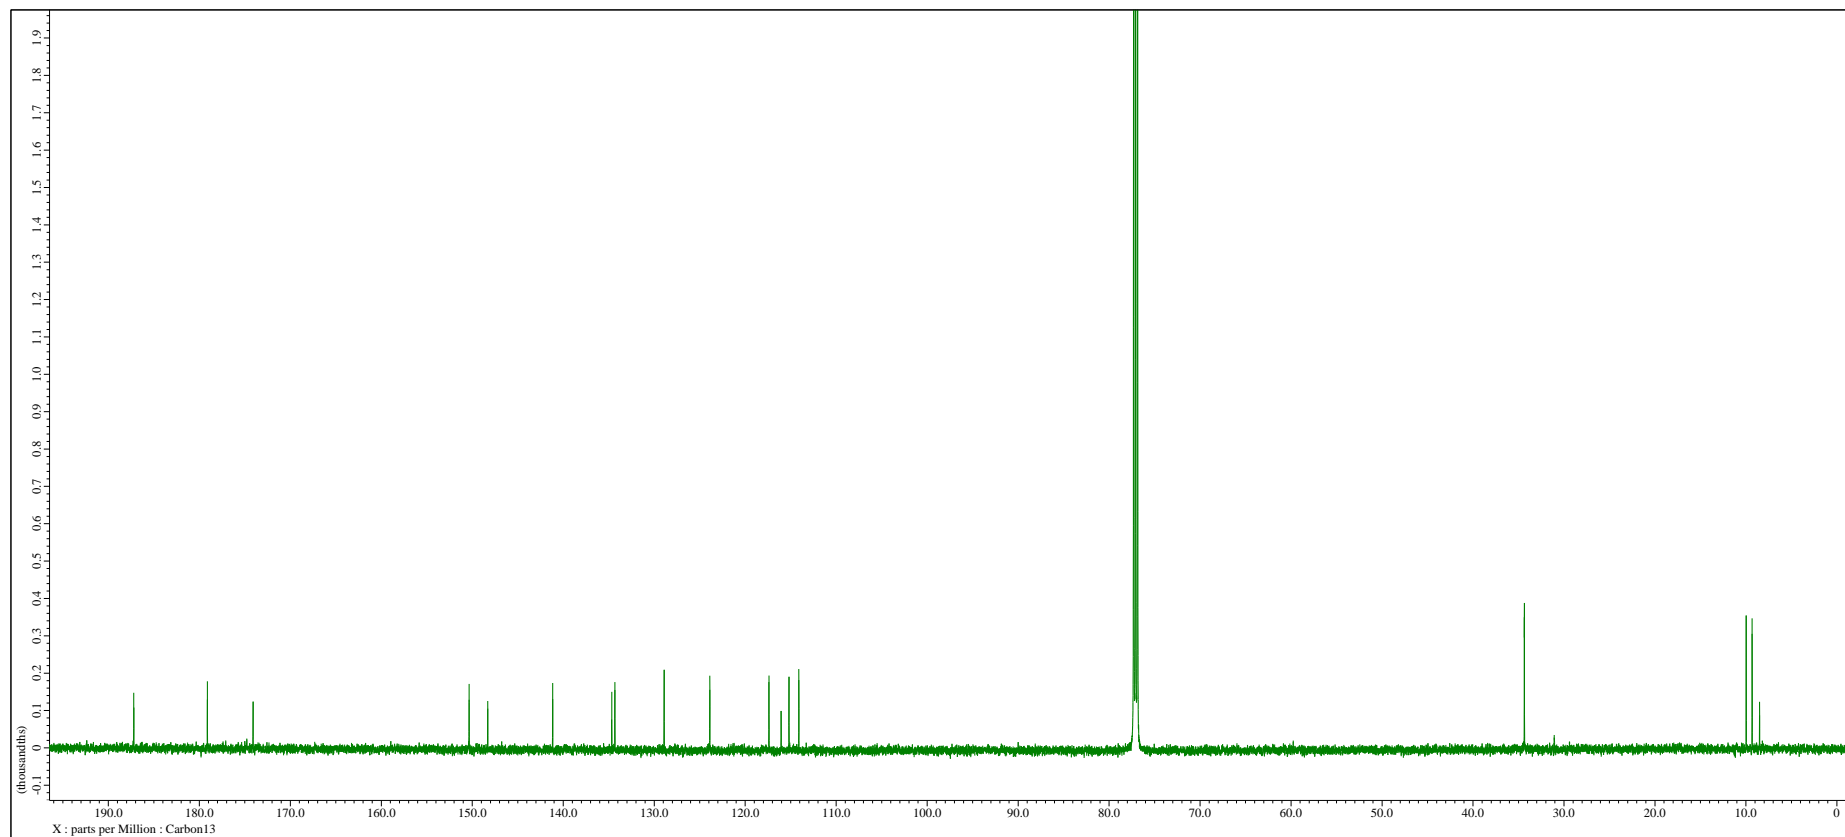

Figure S18:  $^{13}\text{C}$  NMR spectrum of complex **1f**

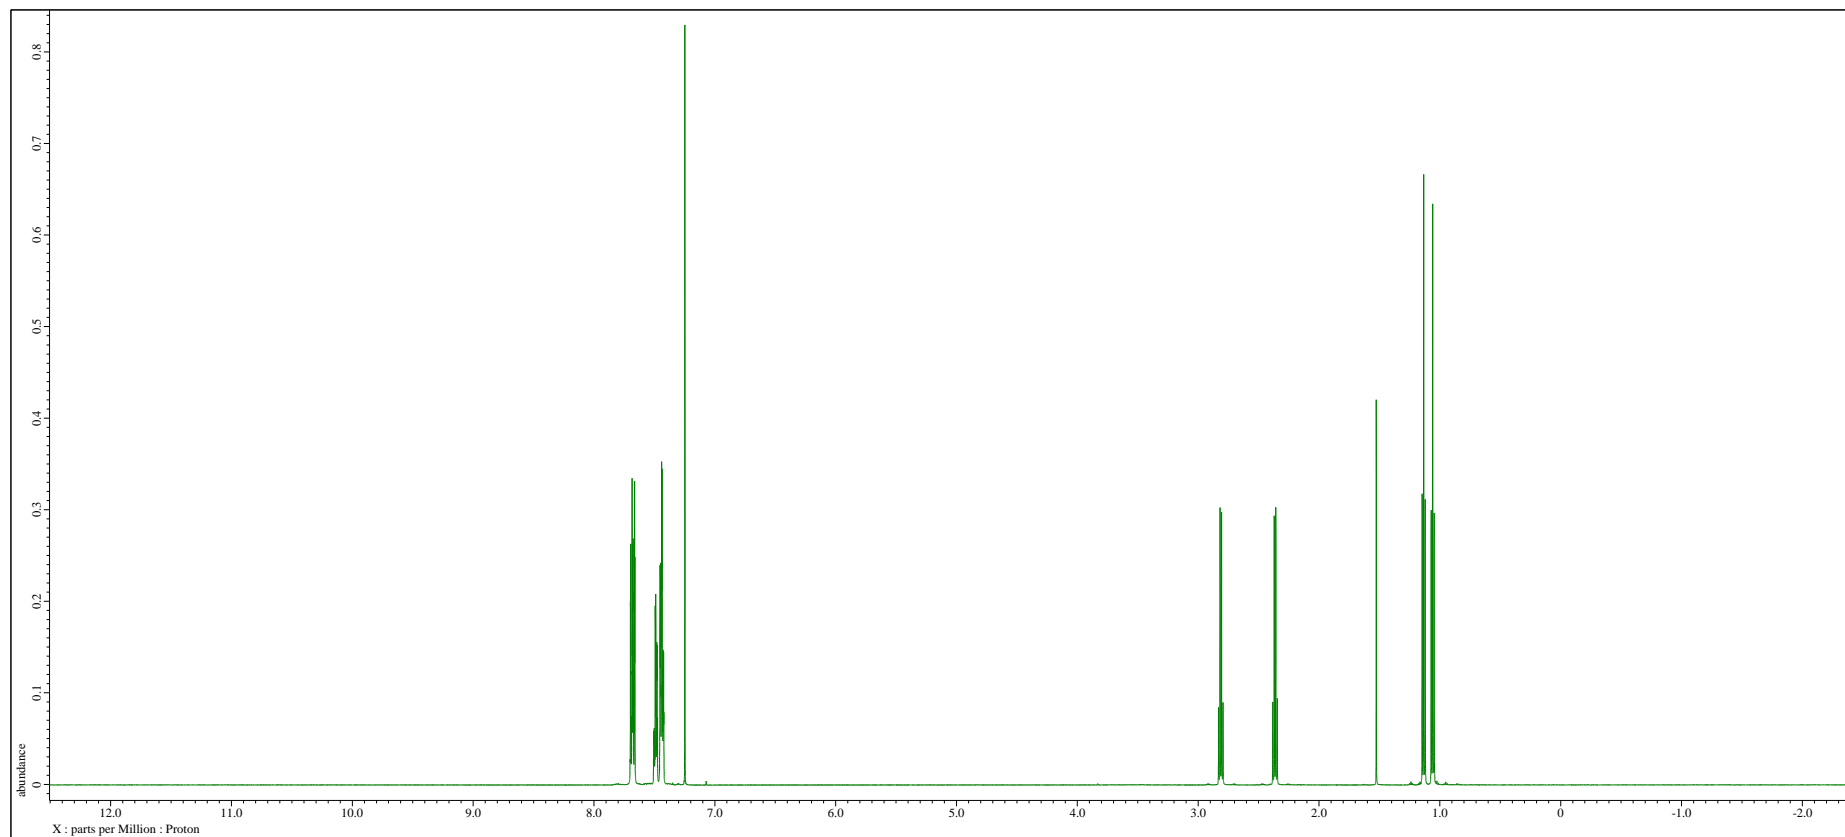

Figure S19:  $^1\text{H}$  NMR spectrum of complex **1g**

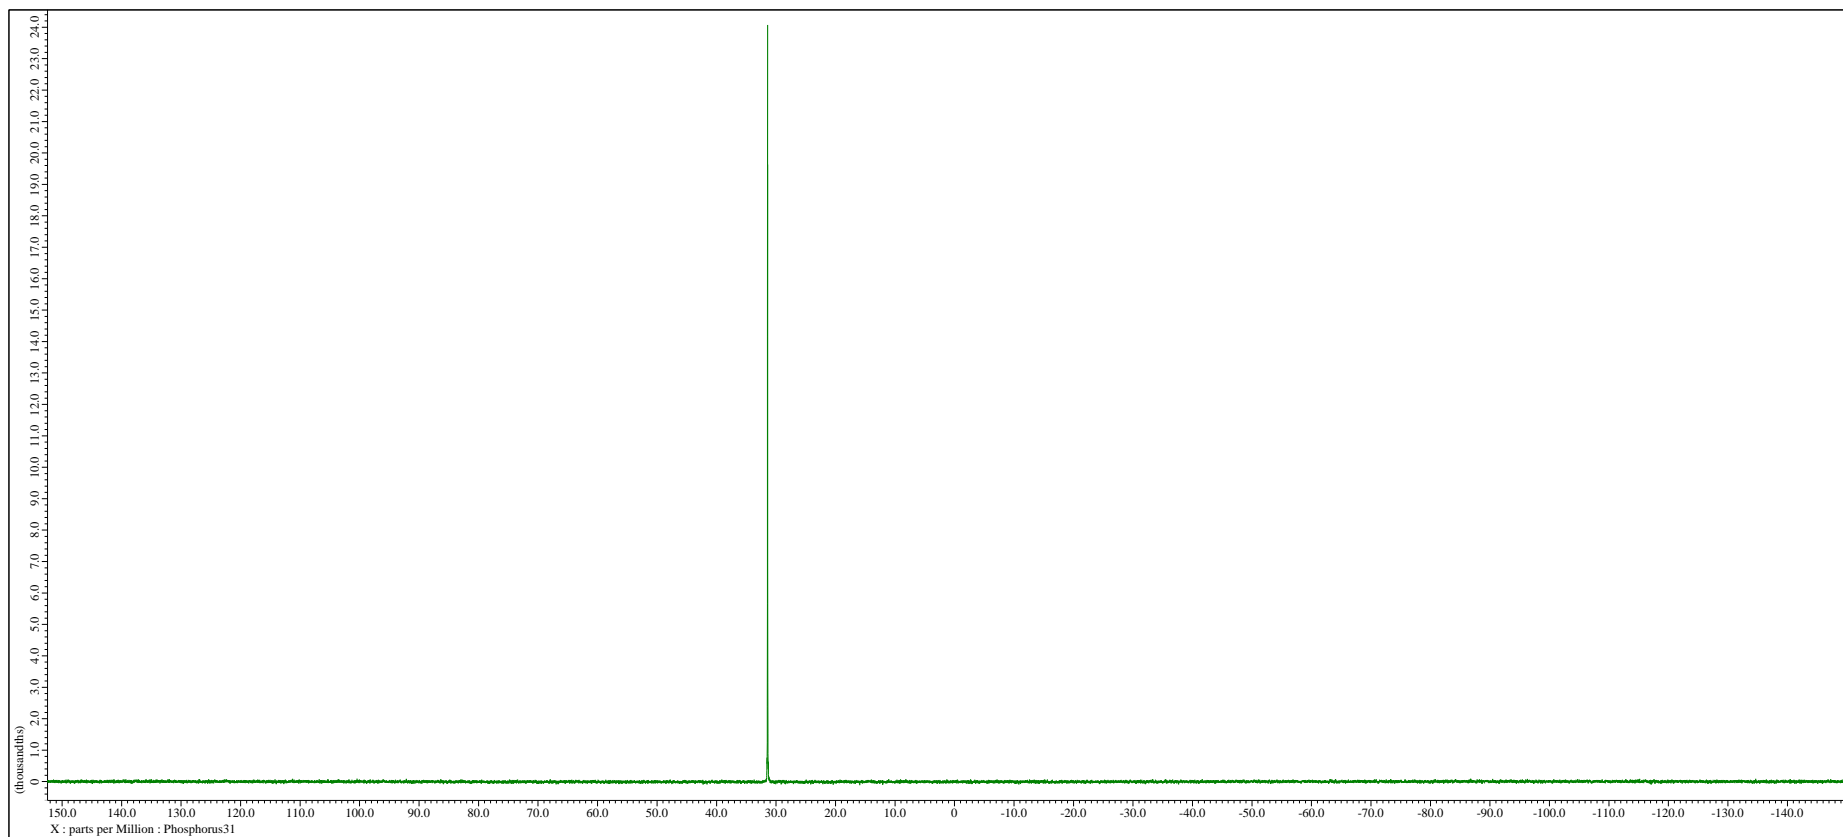

Figure S20:  $^{31}\text{P}\{^1\text{H}\}$  NMR spectrum of complex **1g**

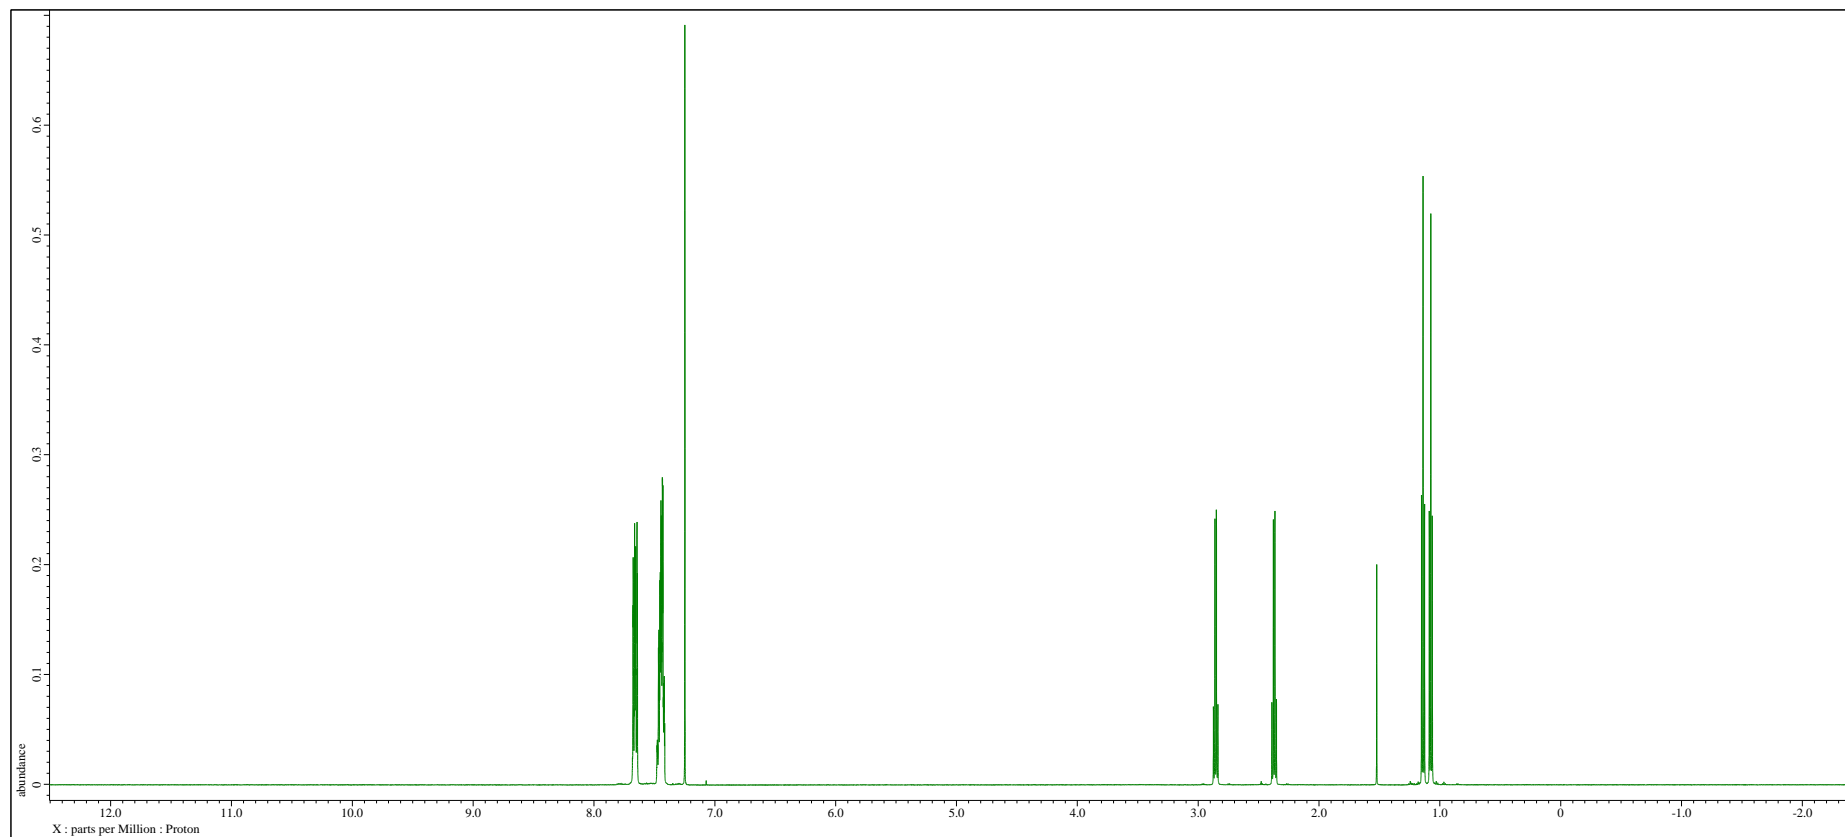

Figure S21:  $^1\text{H}$  NMR spectrum of complex **1g**

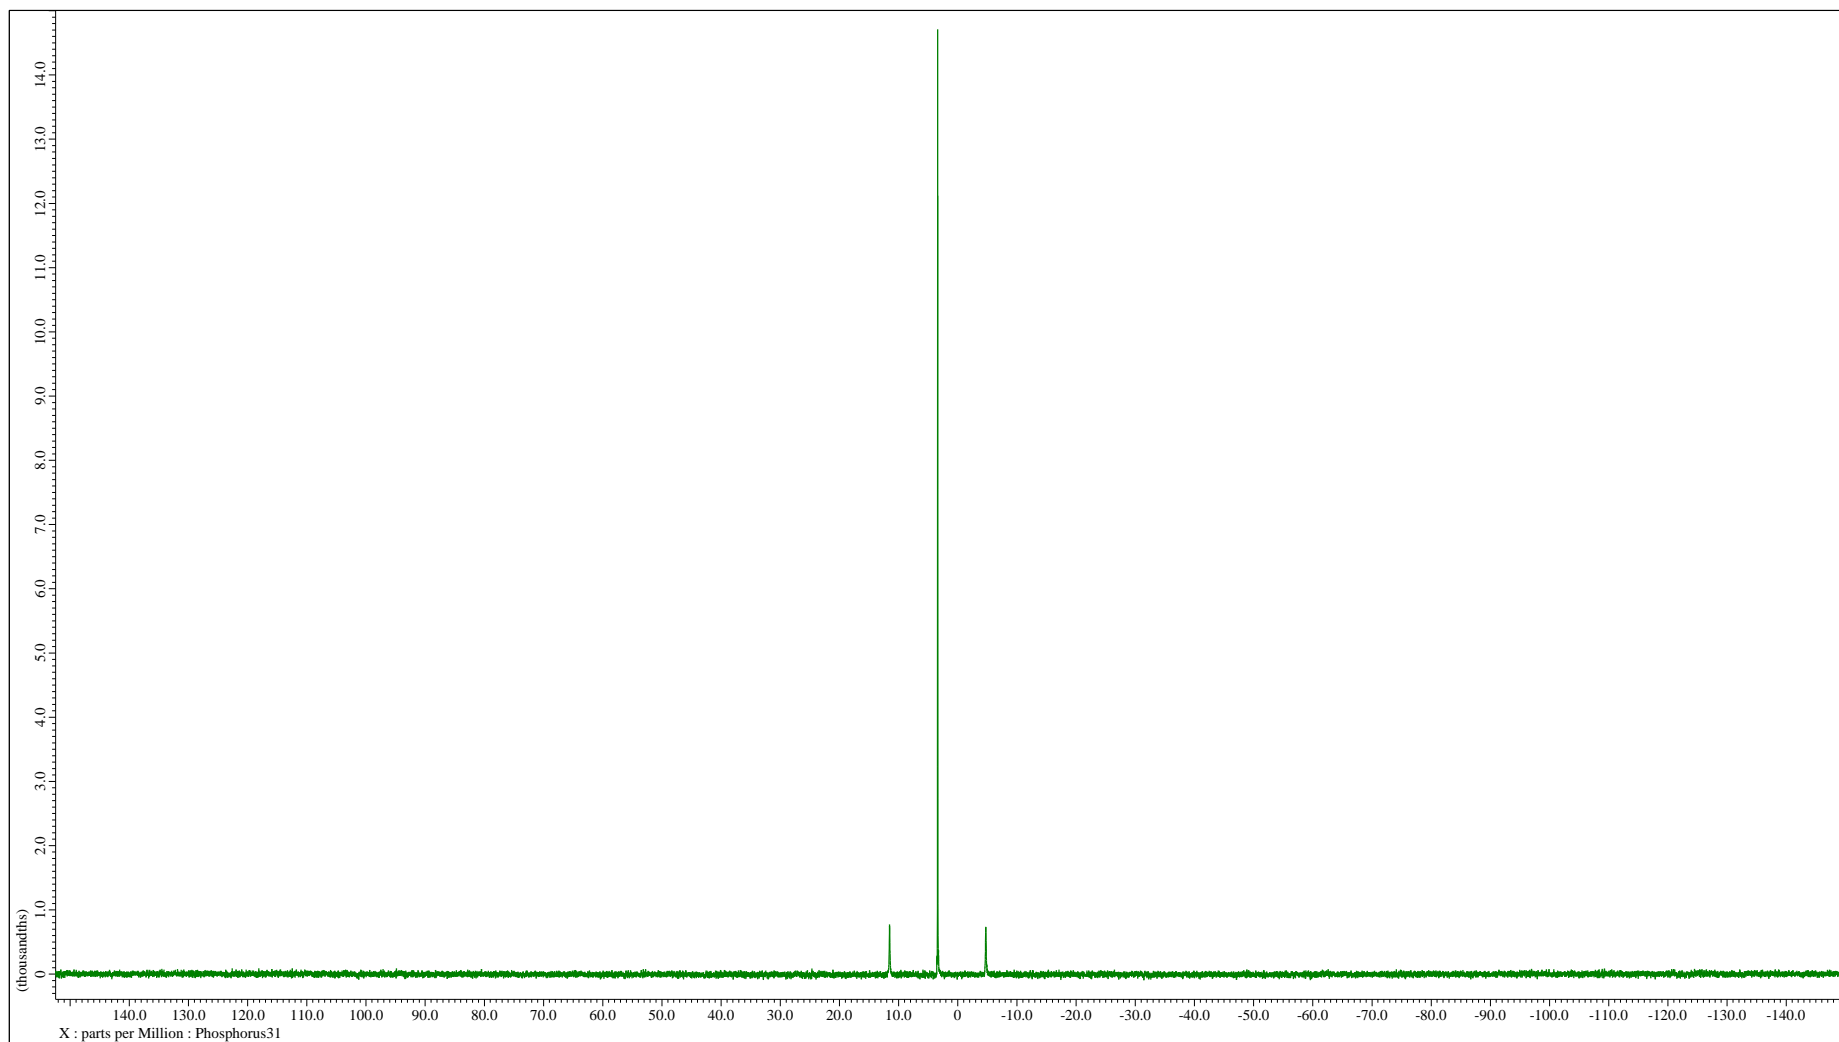

Figure S22:  $^{31}\text{P}\{^1\text{H}\}$  NMR spectrum of complex **1g**



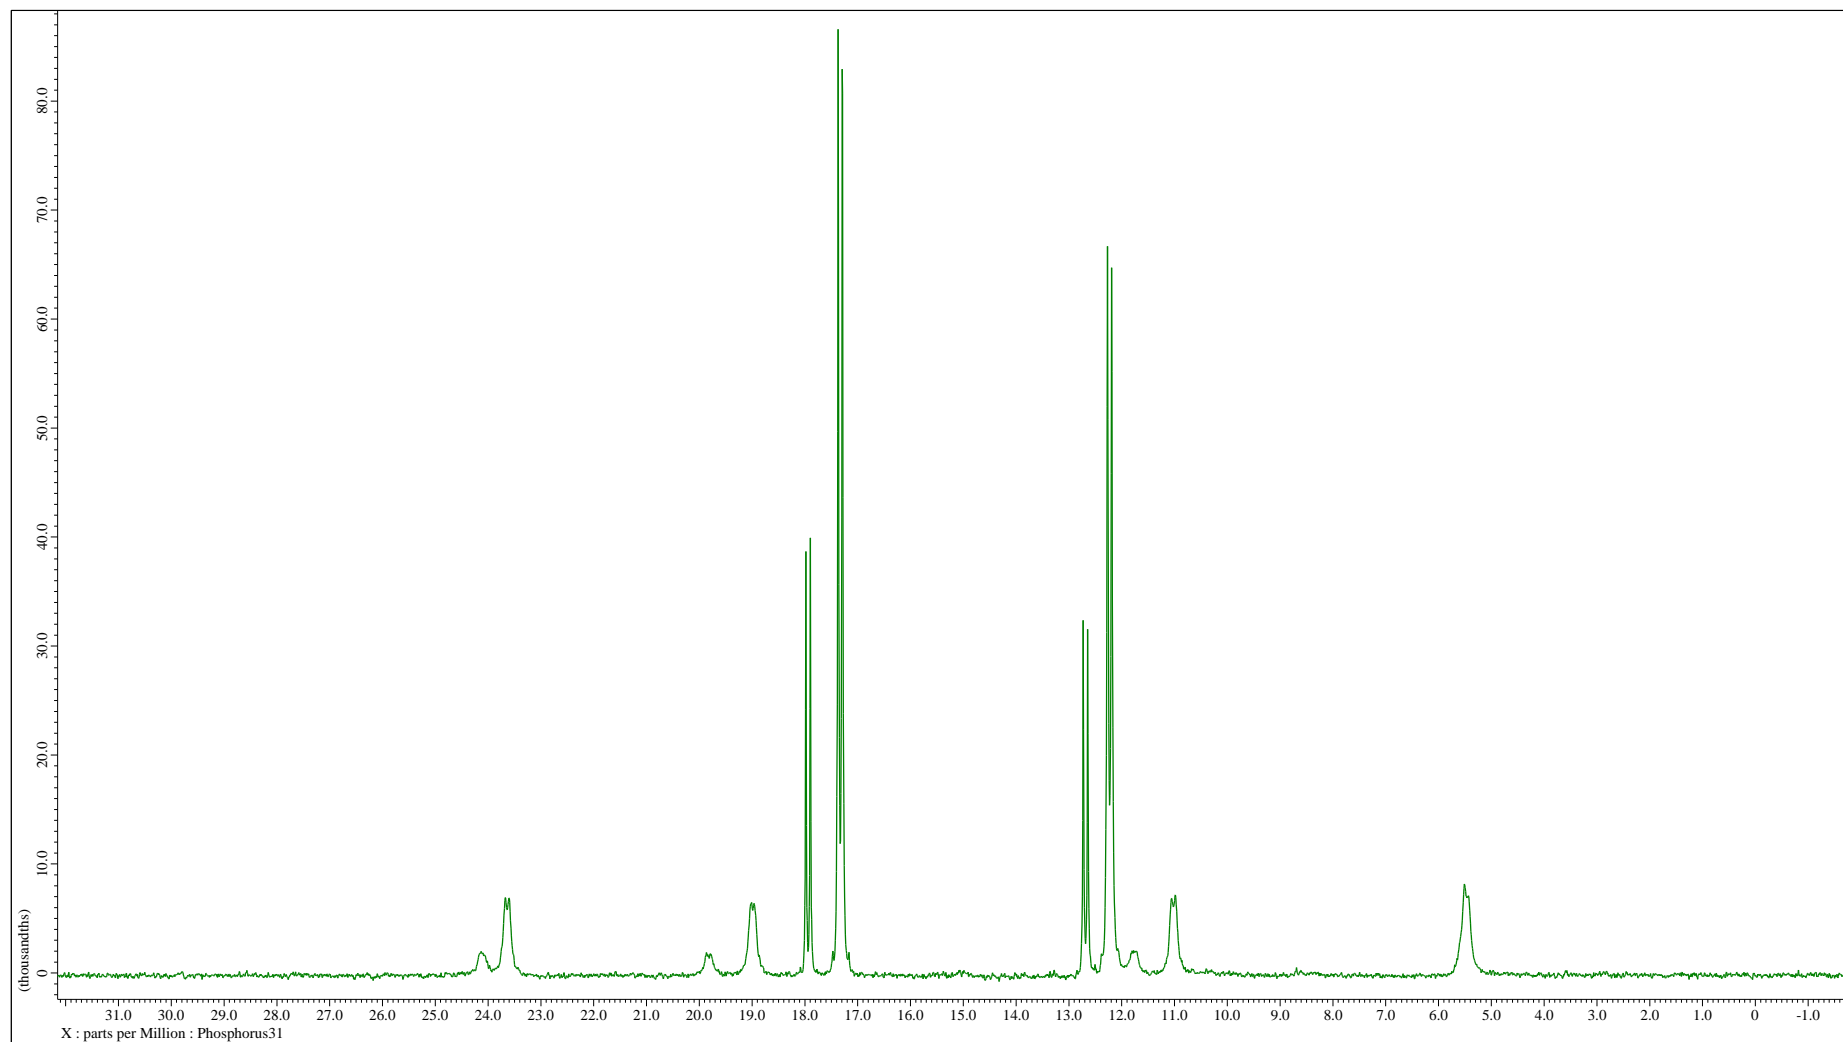

Figure S23:  $^{31}\text{P}\{^1\text{H}\}$  NMR spectrum of complex **1c** showing a second set of resonances due to decomposition.

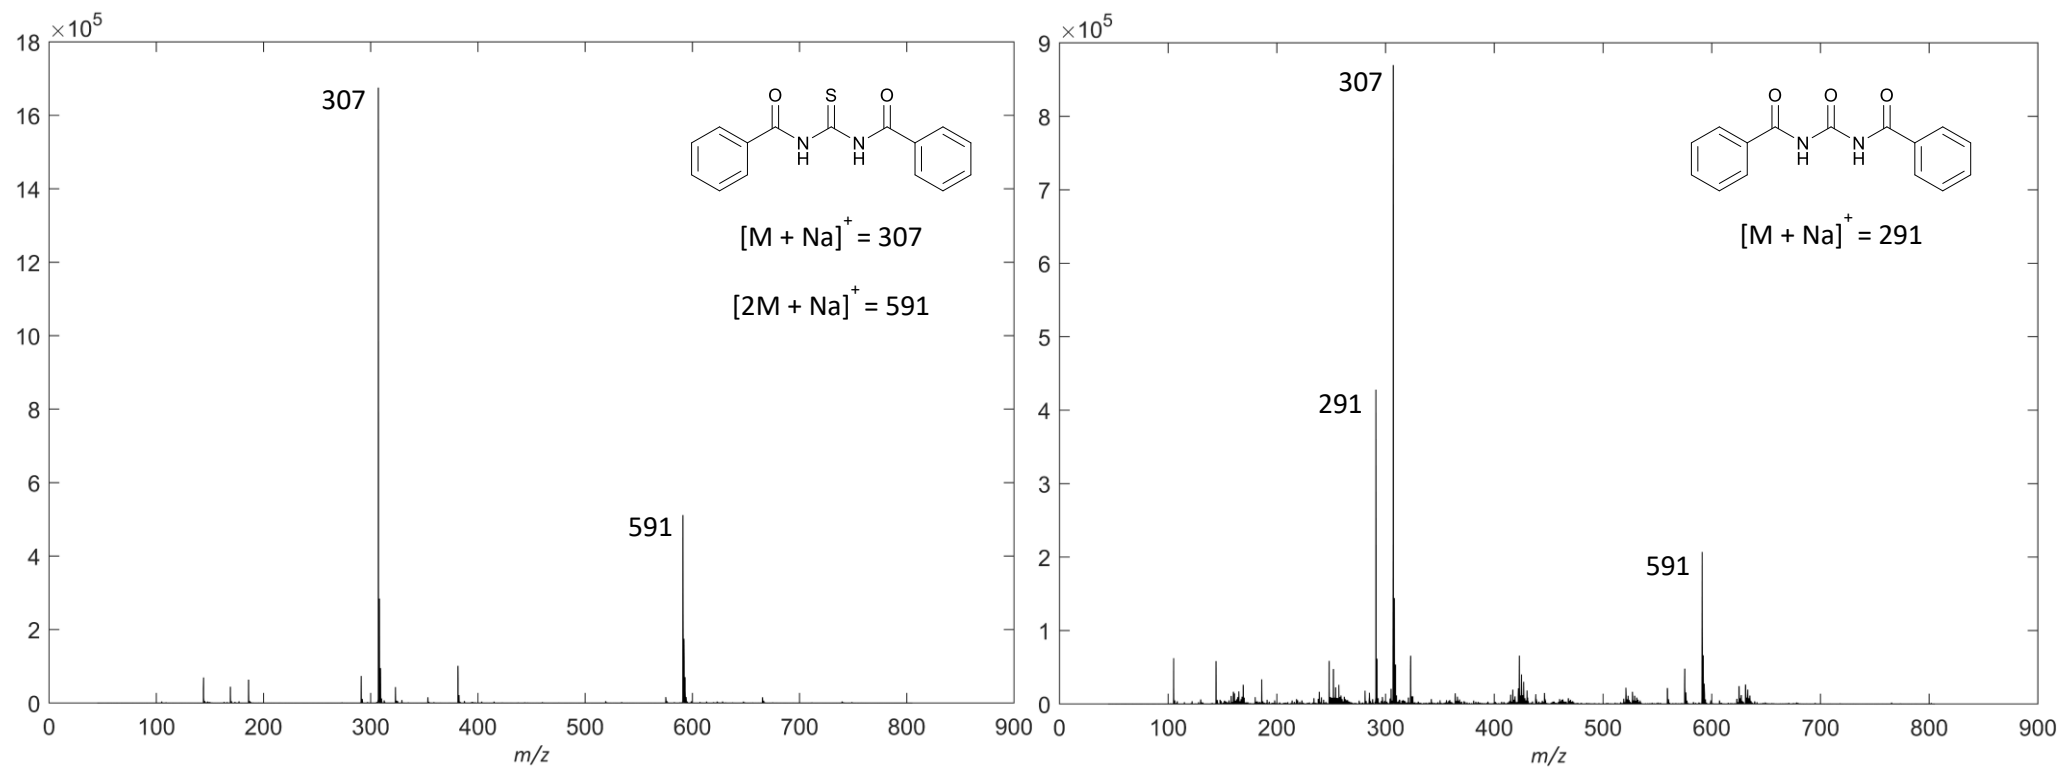

Figure S24: ESI-MS comparison of crude samples of ligand **L3** before (Left) and after (Right) boiling in water for approximately 5 minutes showing the formation of a new peak corresponding to the urea product.

**Crystallographic information:**

Table 1: Selected bond lengths in the molecular structure of molecular structures of complexes **1a**, **1b**, **1f**, **1g**, and **1h** and the molecular structure of **L2**

| Bond           | Bond length (Å) |           | Bond            |          |
|----------------|-----------------|-----------|-----------------|----------|
|                | <b>1a</b>       | <b>1b</b> | <b>1f</b>       |          |
| <b>Pt – P1</b> | 2.307(8)        | 2.306(5)  | <b>Au -N3</b>   | 2.081(4) |
| <b>Pt – P2</b> | 2.255(9)        | 2.249(5)  | <b>Au – C20</b> | 2.018(5) |
| <b>Pt - S1</b> | 2.331(9)        | 2.325(5)  | <b>Au – S1</b>  | 2.290(1) |
| <b>Pt - N1</b> | 2.073(4)        | 2.083(2)  | <b>Au – N1</b>  | 2.105(4) |
| <b>S1- C1</b>  | 1.784(4)        | 1.738(2)  | <b>S1 – C1</b>  | 1.773(4) |
| <b>C1 - N1</b> | 1.390(5)        | 1.382(3)  | <b>C1 – N1</b>  | 1.368(5) |
| <b>C1 - N2</b> | 1.269(5)        | 1.276(3)  | <b>C1 – N2</b>  | 1.305(5) |
|                | <b>1g</b>       | <b>1h</b> | <b>L2</b>       |          |
| <b>M-P1</b>    | 2.246(6)        | 2.227(6)  | <b>S1 - C1</b>  | 1.952(2) |
| <b>M – Cl</b>  | 2.320(9)        | 2.326(8)  | <b>C1 - N1</b>  | 1.382(3) |
| <b>M – S1</b>  | 2.287(7)        | 2.290(7)  | <b>C1 - N2</b>  | 1.370(3) |
| <b>M – N1</b>  | 2.139(2)        | 2.142(2)  | <b>N1 - C2</b>  | 1.381(3) |
| <b>S1 – C1</b> | 1.727(3)        | 1.722(3)  | <b>C2 - O1</b>  | 1.224(2) |
| <b>C1 – N1</b> | 1.331(4)        | 1.344(4)  | <b>N2 - C5</b>  | 1.396(3) |
| <b>C1 – N2</b> | 1.352(3)        | 1.347(3)  | <b>C5 - O2</b>  | 1.206(2) |

Table 2: Crystallographic details for the diacylthiourea molecule **L2** and complexes **1a** and **1b**.

| Complex                                     | <b>L2</b>                                                      | <b>1a</b>                                                                        | <b>1b</b>                                                                                        |
|---------------------------------------------|----------------------------------------------------------------|----------------------------------------------------------------------------------|--------------------------------------------------------------------------------------------------|
| Identification code                         | MCR4                                                           | MCR3                                                                             | MCR2                                                                                             |
| Empirical formula                           | C <sub>7</sub> H <sub>12</sub> N <sub>2</sub> O <sub>2</sub> S | C <sub>41</sub> H <sub>36</sub> N <sub>2</sub> O <sub>2</sub> P <sub>2</sub> PtS | C <sub>44</sub> H <sub>42</sub> Cl <sub>2</sub> N <sub>2</sub> O <sub>2</sub> P <sub>2</sub> PtS |
| Formula weight                              | 188.25                                                         | 877.85                                                                           | 990.83                                                                                           |
| Temperature/K                               | 100.0(2)                                                       | 100.0(2)                                                                         | 100.0(2)                                                                                         |
| Crystal system                              | orthorhombic                                                   | monoclinic                                                                       | monoclinic                                                                                       |
| Space group                                 | P2 <sub>1</sub> 2 <sub>1</sub> 2 <sub>1</sub>                  | P2 <sub>1</sub> /c                                                               | P2 <sub>1</sub> /c                                                                               |
| a/Å                                         | 5.17400(10)                                                    | 14.7870(2)                                                                       | 12.81780(10)                                                                                     |
| b/Å                                         | 9.3578(2)                                                      | 11.88550(10)                                                                     | 21.7252(2)                                                                                       |
| c/Å                                         | 19.0340(4)                                                     | 20.6357(2)                                                                       | 14.81870(10)                                                                                     |
| α/°                                         | 90                                                             | 90                                                                               | 90                                                                                               |
| β/°                                         | 90                                                             | 94.9210(10)                                                                      | 103.0940(10)                                                                                     |
| γ/°                                         | 90                                                             | 90                                                                               | 90                                                                                               |
| Volume/Å <sup>3</sup>                       | 921.57(3)                                                      | 3613.37(7)                                                                       | 4019.26(6)                                                                                       |
| Z                                           | 4                                                              | 4                                                                                | 4                                                                                                |
| ρ <sub>calc</sub> /cm <sup>3</sup>          | 1.3567                                                         | 1.6136                                                                           | 1.6373                                                                                           |
| μ/mm <sup>-1</sup>                          | 2.848                                                          | 8.943                                                                            | 9.310                                                                                            |
| F(000)                                      | 402.5                                                          | 1734.3                                                                           | 1969.5                                                                                           |
| Crystal size/mm <sup>3</sup>                | 0.12 × 0.05 × 0.01                                             | 0.18 × 0.18 × 0.14                                                               | 1.12 × 0.12 × 0.1                                                                                |
| Radiation                                   | Cu Kα (λ = 1.54184)                                            | Cu Kα (λ = 1.54184)                                                              | Cu Kα (λ = 1.54184)                                                                              |
| 2θ range for data collection/°              | 9.3 to 148.16                                                  | 6 to 148.62                                                                      | 7.08 to 148.46                                                                                   |
| Index ranges                                | -6 ≤ h ≤ 6, -11 ≤ k ≤ 7, -23 ≤ l ≤ 22                          | -18 ≤ h ≤ 18, -14 ≤ k ≤ 14, -25 ≤ l ≤ 24                                         | -16 ≤ h ≤ 15, -26 ≤ k ≤ 26, -18 ≤ l ≤ 18                                                         |
| Reflections collected                       | 5339                                                           | 56816                                                                            | 64158                                                                                            |
| Independent reflections                     | 1799 [R <sub>int</sub> = 0.0395, R <sub>sigma</sub> = 0.0387]  | 7283 [R <sub>int</sub> = 0.0460, R <sub>sigma</sub> = 0.0256]                    | 8104 [R <sub>int</sub> = 0.0451, R <sub>sigma</sub> = 0.0244]                                    |
| Data/restraints/parameters                  | 1799/0/111                                                     | 7283/0/445                                                                       | 8104/0/490                                                                                       |
| Goodness-of-fit on F <sup>2</sup>           | 1.030                                                          | 1.039                                                                            | 1.025                                                                                            |
| Final R indexes [I >= 2σ (I)]               | R <sub>1</sub> = 0.0290, wR <sub>2</sub> = 0.0774              | R <sub>1</sub> = 0.0316, wR <sub>2</sub> = 0.0752                                | R <sub>1</sub> = 0.0190, wR <sub>2</sub> = 0.0425                                                |
| Final R indexes [all data]                  | R <sub>1</sub> = 0.0318, wR <sub>2</sub> = 0.0788              | R <sub>1</sub> = 0.0352, wR <sub>2</sub> = 0.0771                                | R <sub>1</sub> = 0.0209, wR <sub>2</sub> = 0.0432                                                |
| Largest diff. peak/hole / e Å <sup>-3</sup> | 0.39/-0.20                                                     | 1.81/-1.75                                                                       | 0.60/-0.61                                                                                       |

Table 3: Crystallographic details for the complexes **1f**, **1g** and **1h**

| Complex                                     | <b>1f</b>                                                         | <b>1g</b>                                                            | <b>1h</b>                                                            |
|---------------------------------------------|-------------------------------------------------------------------|----------------------------------------------------------------------|----------------------------------------------------------------------|
| Identification code                         | MCR103_auto                                                       | MCR105_auto                                                          | MCR106_auto                                                          |
| Empirical formula                           | C <sub>18</sub> H <sub>19</sub> AuN <sub>4</sub> O <sub>2</sub> S | C <sub>25</sub> H <sub>26</sub> ClN <sub>2</sub> O <sub>2</sub> PPdS | C <sub>25</sub> H <sub>26</sub> ClN <sub>2</sub> O <sub>2</sub> PPTs |
| Formula weight                              | 552.41                                                            | 591.41                                                               | 680.07                                                               |
| Temperature/K                               | 100.00(10)                                                        | 100.00(10)                                                           | 100.0(3)                                                             |
| Crystal system                              | monoclinic                                                        | triclinic                                                            | triclinic                                                            |
| Space group                                 | P2 <sub>1</sub> /c                                                | P-1                                                                  | P-1                                                                  |
| a/Å                                         | 12.94247(16)                                                      | 9.70784(19)                                                          | 9.69560(14)                                                          |
| b/Å                                         | 19.2338(2)                                                        | 10.9768(3)                                                           | 11.01772(16)                                                         |
| c/Å                                         | 7.50278(9)                                                        | 12.7313(3)                                                           | 12.69262(16)                                                         |
| α/°                                         | 90                                                                | 68.297(2)                                                            | 68.3323(13)                                                          |
| β/°                                         | 104.5517(12)                                                      | 85.0358(17)                                                          | 85.0689(11)                                                          |
| γ/°                                         | 90                                                                | 81.1443(18)                                                          | 81.4341(12)                                                          |
| Volume/Å <sup>3</sup>                       | 1807.77(4)                                                        | 1244.81(5)                                                           | 1245.30(3)                                                           |
| Z                                           | 4                                                                 | 2                                                                    | 2                                                                    |
| ρ <sub>calc</sub> /cm <sup>3</sup>          | 2.0295                                                            | 1.5777                                                               | 1.8135                                                               |
| μ/mm <sup>-1</sup>                          | 16.548                                                            | 8.597                                                                | 13.122                                                               |
| F(000)                                      | 1051.9                                                            | 603.7                                                                | 658.8                                                                |
| Crystal size/mm <sup>3</sup>                | 0.05 × 0.05 × 0.02                                                | 0.05 × 0.04 × 0.03                                                   | 0.05 × 0.05 × 0.04                                                   |
| Radiation                                   | Cu Kα (λ = 1.54184)                                               | Cu Kα (λ = 1.54184)                                                  | Cu Kα (λ = 1.54184)                                                  |
| 2θ range for data collection/°              | 8.42 to 144.68                                                    | 7.48 to 144.26                                                       | 7.5 to 144.72                                                        |
| Index ranges                                | -15 ≤ h ≤ 15, -23 ≤ k ≤ 21, -9 ≤ l ≤ 9                            | -11 ≤ h ≤ 11, -13 ≤ k ≤ 13, -15 ≤ l ≤ 15                             | -11 ≤ h ≤ 11, -13 ≤ k ≤ 13, -15 ≤ l ≤ 14                             |
| Reflections collected                       | 48018                                                             | 33325                                                                | 35228                                                                |
| Independent reflections                     | 3476 [R <sub>int</sub> = 0.0556, R <sub>sigma</sub> = 0.0211]     | 4736 [R <sub>int</sub> = 0.0675, R <sub>sigma</sub> = 0.0332]        | 4735 [R <sub>int</sub> = 0.0509, R <sub>sigma</sub> = 0.0258]        |
| Data/restraints/parameters                  | 3476/0/240                                                        | 4736/0/300                                                           | 4735/0/300                                                           |
| Goodness-of-fit on F <sup>2</sup>           | 1.063                                                             | 1.028                                                                | 1.049                                                                |
| Final R indexes [I >= 2σ (I)]               | R <sub>1</sub> = 0.0304, wR <sub>2</sub> = 0.0790                 | R <sub>1</sub> = 0.0335, wR <sub>2</sub> = 0.0908                    | R <sub>1</sub> = 0.0178, wR <sub>2</sub> = 0.0429                    |
| Final R indexes [all data]                  | R <sub>1</sub> = 0.0344, wR <sub>2</sub> = 0.0846                 | R <sub>1</sub> = 0.0357, wR <sub>2</sub> = 0.0922                    | R <sub>1</sub> = 0.0188, wR <sub>2</sub> = 0.0432                    |
| Largest diff. peak/hole / e Å <sup>-3</sup> | 3.08/-1.73                                                        | 1.49/-1.40                                                           | 0.58/-1.05                                                           |

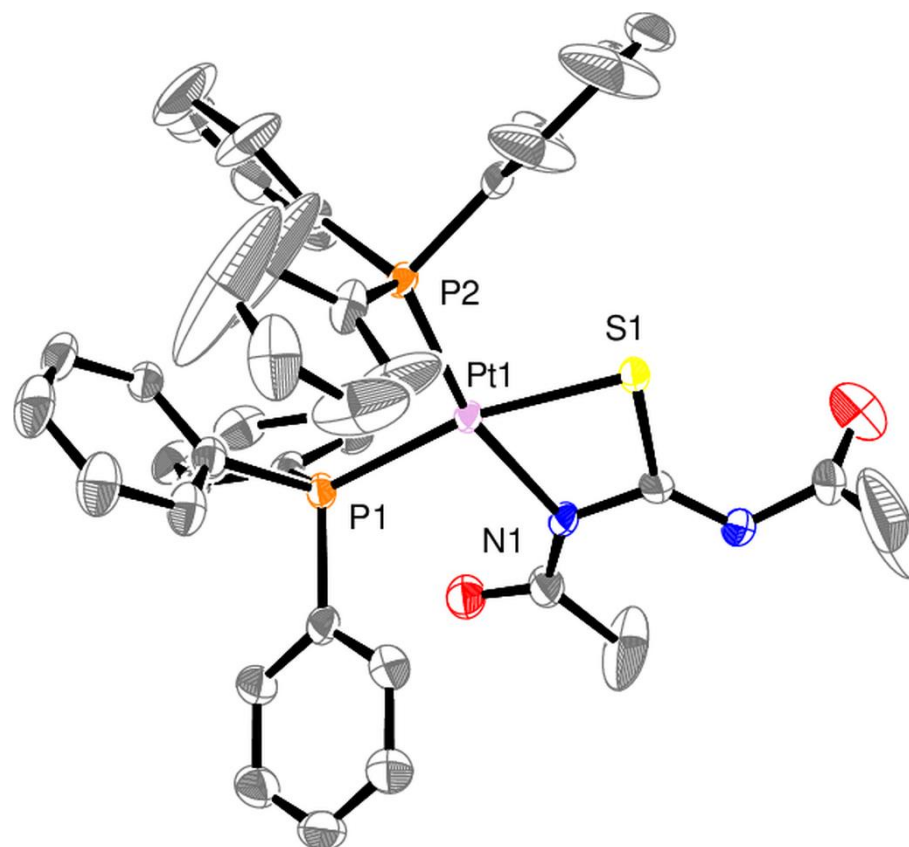

Figure S24: Molecular structure of the complex  $[Pt\{EtC(O)NC(S)NC(O)Et\}(PPh_3)_2]$  **1a** showing a partial atom numbering scheme. Hydrogen atoms and a molecule of dichloromethane of crystallisation are omitted for clarity and ellipsoids are shown at the 50% probability level.

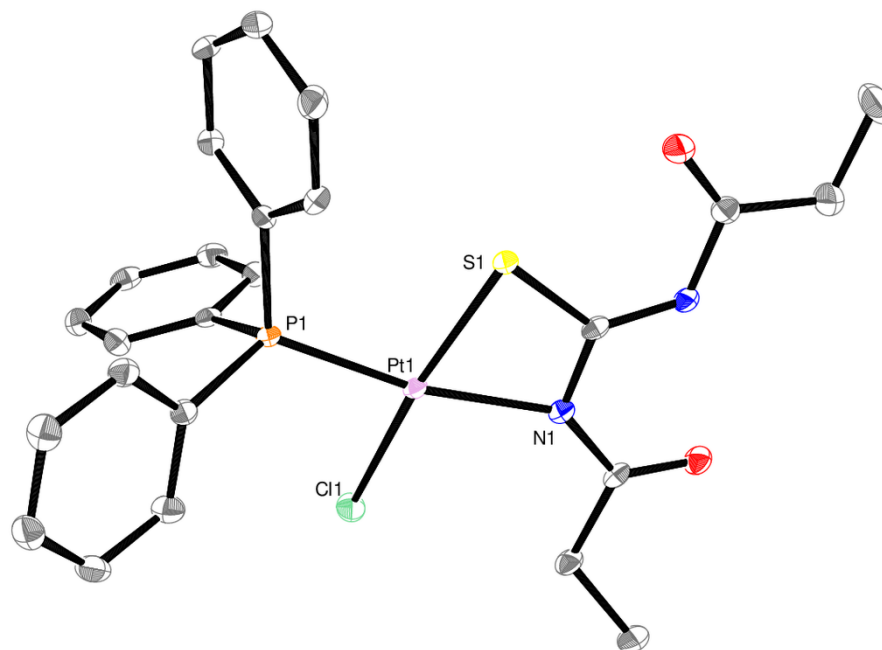

Figure S25: Molecular structure of the complex  $[Pd\{EtC(O)NC(S)NHC(O)Et\}(PPh_3)Cl]$  **1f** showing a partial atom numbering scheme. Hydrogen atoms and a molecule of dichloromethane of crystallisation are omitted for clarity and ellipsoids are shown at the 50% probability level.

Computational information:

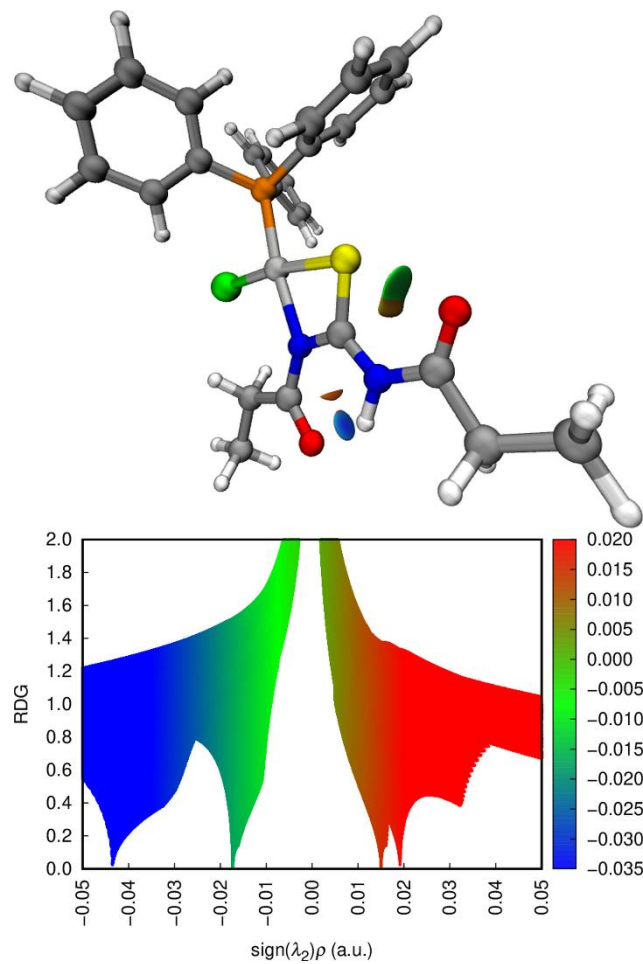

Figure S26: Plot of RDG versus  $\text{sign}(\lambda_2)\rho$  for **1f** showing troughs related to chalcogen interactions and NCI isosurfaces using a blue-green-red colour scale. Isovalue = 0.5 for clarity.



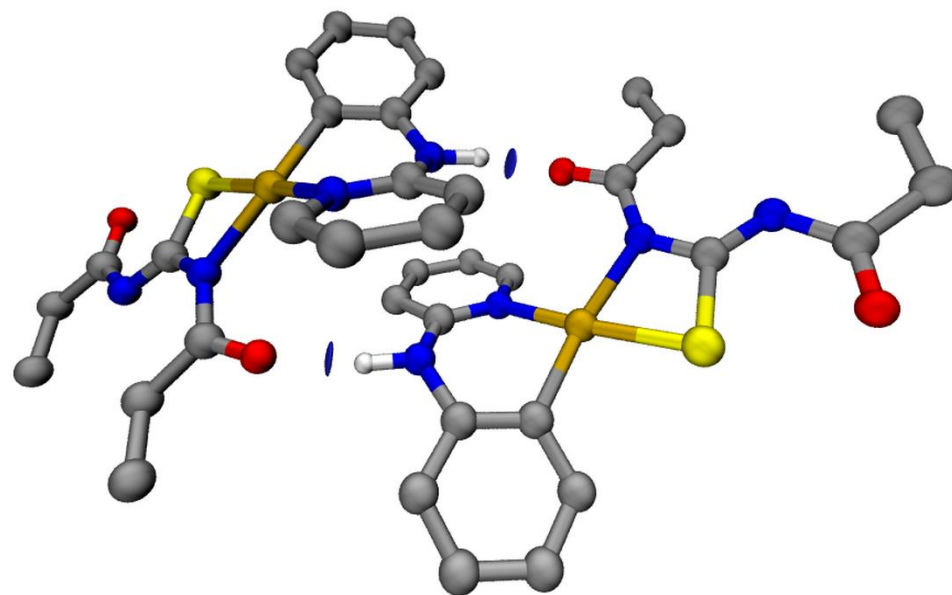

Figure S27: NCI isosurfaces of H bonded interactions of the Au dimer of 1f in the solid state using a blue-green-red colour scale. Isovalue = 0.4 for clarity.

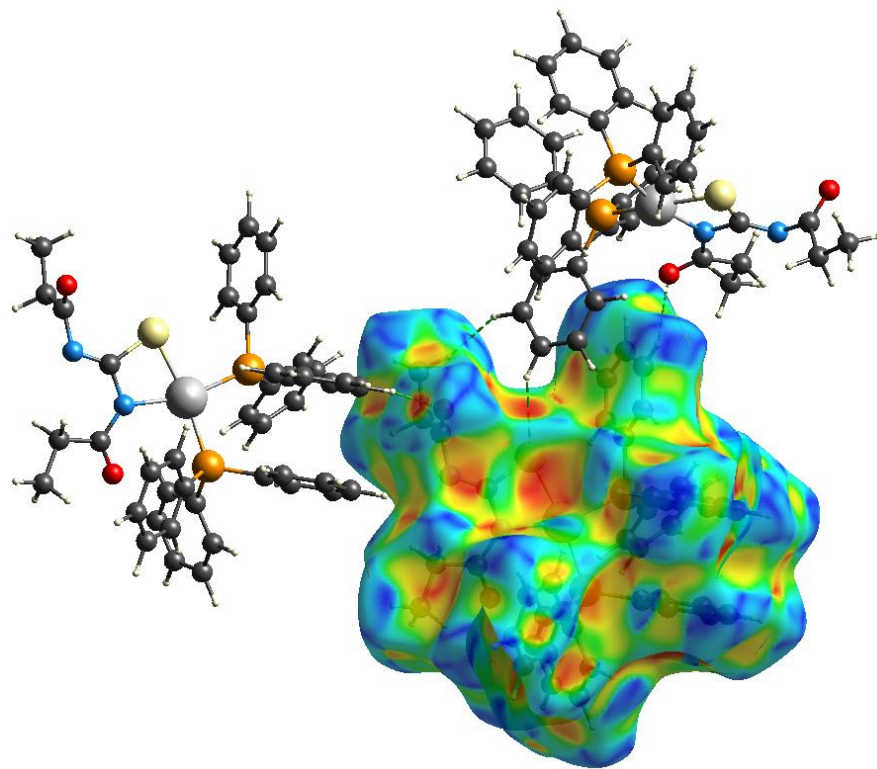

Figure S28: Hirshfeld surface index of complex **1a**
